## 23 **Abstract**

24 Cancer cells' ability to inhibit apoptosis is key to malignant transformation and limits response to  
25 therapy. Here, we performed multiplexed immunofluorescence analysis on tissue microarrays with  
26 373 cores from 168 patients, segmentation of 2.4 million individual cells and quantification of 20 cell  
27 lineage and apoptosis proteins. Ordinary differential equation-based modelling of apoptosis  
28 sensitivity at single cell resolution was conducted and an atlas of inter- and intra-tumor heterogeneity  
29 in apoptosis susceptibility generated. We identified an enrichment for BCL2 in immune, and BAK,  
30 SMAC and XIAP in cancer cells. ODE-based modelling at single cell resolution identified an enhanced  
31 sensitivity of cancer cells to mitochondrial permeabilization and executioner caspase activation  
32 compared to immune and stromal cells, with significant inter- and intra-tumor heterogeneity.  
33 However, we did not find increased spatial heterogeneity of apoptosis signaling in cancer cells,  
34 suggesting that such heterogeneity is an intrinsic, non-genomic property not increased by the process  
35 of malignant transformation.

## 36 Introduction

37 Alterations in apoptosis signaling is key step in tumorigenesis(Hanahan and Weinberg, 2011). In many  
38 cases, cancer epithelial cells over time acquire alterations in their genome or epigenome that either  
39 result in an up-regulation of anti-apoptotic or a down regulation of pro-apoptotic proteins. Examples  
40 for such (epi)genomic alterations include promoter methylation and copy number alterations  
41 (Berdasco and Esteller, 2010; Mauro et al., 2015), while single point mutations in apoptosis-regulating  
42 genes are relatively rarely observed. Previous quantitative studies in solid tumor tissues found  
43 significant, but often complex differences in levels of individual anti- or pro-apoptotic proteins  
44 between different patients (Lindner et al., 2013; Lindner et al., 2017; Salvucci et al., 2017; Salvucci et  
45 al., 2019b). Predictions of individual patient's apoptosis susceptibility is further complicated by the  
46 signaling redundancies in key apoptosis pathways, in particular the mitochondrial apoptosis pathway.  
47 Here, activation of either BAK or BAX is sufficient to induce mitochondrial outer membrane  
48 permeabilization (MOMP) (Kalkavan and Green, 2018), and this process is inhibited by a variety of  
49 different anti-apoptotic Bcl-2 family proteins including BCL2 itself, BCL(X)L and MCL1(Certo et al.,  
50 2006; Kalkavan and Green, 2018). Research into Bcl-2 family proteins and other apoptosis signaling  
51 proteins have resulted in the development and subsequent clinical approval of apoptosis sensitizers  
52 as anti-cancer agents. For example, Venetoclax is a selective BCL2 antagonist now used for the  
53 treatment of chronic lymphocytic leukemia, small lymphocytic lymphoma and acute myeloid leukemia  
54 which are characterized by strong BCL2 overexpression and dependency (Roberts et al., 2016). In  
55 context of solid tumors, the entry of apoptosis sensitizers into clinical practice has been relatively slow,  
56 a fact that is partially explained by the lack of gene mutations or pronounced over- or under-  
57 expression of individual apoptosis signaling proteins in solid tumor cells which could otherwise serve  
58 as stratification tools in clinical trials.

59 To overcome such limitations, various groups have developed computational models that describe  
60 apoptosis sensitivity on a systems level. BH3-only proteins are upstream initiators of the mitochondrial  
61 apoptosis pathway that are activated transcriptionally or post-translationally in response to stresses,  
62 such as DNA damage, genotoxic drugs, irradiation or withdrawal of trophic support. BH3-only proteins  
63 activate BAK and BAX directly, or activate these indirectly by binding to and neutralizing anti-apoptotic  
64 Bcl-2 proteins (Leber et al., 2007). BH3-peptide profiling has been successfully applied to predict  
65 outcome and responses to cancer therapeutics in solid cancers, however this technique requires fresh  
66 tissue (Ni Chonghaile et al., 2011). Other groups, including our own, have used gene expression or  
67 protein level (Reverse Protein Phase Array, RPPA) data of apoptosis-regulating genes from fresh-

68 frozen or formalin-fixed tissues as input into deterministic signaling network models to estimate the  
69 intrinsic apoptosis sensitivity of individual tumors (Lindner et al., 2017; Salvucci et al., 2017).

70 Notwithstanding the successful application of these techniques in predicting chemotherapy responses  
71 and clinical outcome in cancer patients, the above techniques usually require a tissue homogenate to  
72 be analyzed. However, such “bulk” profiling results in the loss of not only important spatial  
73 information but also the precise cell-of-origin of the signals. It is feasible that some cancer cell  
74 populations in a given tumor are more resistant to therapy than other cancer cells, which is in line  
75 with evidence indicating the role of tumor heterogeneity in determining clinical outcome and  
76 responses to therapy (Fisher et al., 2013; Marusyk et al., 2012). Such resistant cell populations could  
77 give rise to more aggressive tumors on recurrence. Similarly, chemo- or radiation therapy not only  
78 affects tumor cells, but also cells in the tumor microenvironment such as immune cells; therefore, a  
79 higher apoptosis sensitivity of anti-tumor immune cells compared to cancer epithelial cells may be  
80 detrimental to patients.

81 To describe the extent of inter-individual and intra-tumor heterogeneity in apoptosis signaling, herein  
82 we employed an innovative multiplexed immunofluorescence imaging technique (Cell DIVE™), which  
83 is comprised of a repeated stain-image-dye-inactivation sequence using direct antibody-fluorophore  
84 conjugates, as well as a small number of primary antibodies from distinct species with secondary  
85 antibody detection (Gerdes et al., 2013), followed by single cell segmentation in a colorectal tumor  
86 tissue cohort. Using this method, we imaged 20 proteins and mapped quantities of the key members  
87 of the mitochondrial apoptosis pathway to 2.4 million individual cells (of which 1.6 million were  
88 colorectal tumor epithelial cells). This enabled us to calculate each individual cell’s apoptosis  
89 sensitivity through single cell systems modelling, and quantitatively describe inter- and intra-tumor  
90 heterogeneity of the mitochondrial apoptosis pathway within the different cell types that constitute  
91 a colorectal tumor.

92 To assess intrinsic apoptosis sensitivity of individual tumors, we had previously applied ‘averaged’  
93 protein levels of tissue, but never single cell levels to our experimentally validated models, APOPTO-  
94 CELL (Huber et al., 2007; Rehm et al., 2006) and DR\_MOMP (Lindner et al., 2013). Studying single cells’  
95 with our apoptosis models is providing us with new insights into the mechanisms underlying apoptosis  
96 and treatment resistance.

## 97 **Results**

### 98 **Multiplexed immunofluorescence imaging generates single cell** 99 **profiles of mitochondrial apoptosis pathway proteins in 1.6 million** 100 **individual colorectal tumor cells**

101 To explore the levels of key proteins of the mitochondrial apoptosis pathways in colorectal cancer  
102 (CRC) tissue at the single cell level, we performed Cell DIVE™ multiplexing of nine pro- and anti-  
103 apoptotic proteins in regions of resected primary tumors in 355 tumor cores derived from 164 stage III  
104 CRC patients.

105 Apoptosis signaling protein selected for analysis included BCL2, BCL(X)L, MCL1, BAK and BAX which  
106 regulate the process of mitochondrial outer membrane permeabilization (MOMP), as well as PRO-  
107 CASPASE 9, PRO-CASPASE 3, XIAP and SMAC (DIABLO) which control the process of executioner  
108 caspase activation downstream of MOMP. For both processes, we previously devised and  
109 experimentally validated ordinary differential equation (ODE)-based, deterministic models, APOPTO-  
110 CELL (Huber et al., 2007; Rehm et al., 2006) and DR\_MOMP (Lindner et al., 2013), that calculate the  
111 sensitivity of cancer cells to undergo mitochondrial apoptosis with high accuracy (Lindner et al., 2017;  
112 Salvucci et al., 2017), using quantities of the above 9 proteins as model input. Additional proteins  
113 selected for this study included cell identity markers (CD3, CD4, CD8, CD45, FOXP3, PCK26 and  
114 cytokeratin AE1), established markers of cell proliferation (KI67), antigen-presenting protein (HLA-A)  
115 and bioenergetics (GLUT1, CA9), as well as proteins used for cell segmentation analysis (Na<sup>+</sup>/K<sup>+</sup>-  
116 ATPase, cytokeratin AE1, PCK26, and S6).

117 We proceeded with multiplexed data acquisition of colon tumor tissue as follows (Figure 1A):  
118 1-5) FFPE cores where formalin fixed paraffin embedded (FFPE) tissue microarrays first underwent  
119 antigen retrieval, followed by repeated cycles of protein staining, imaging and dye inactivation using  
120 cyanine dyes (Cy3 and Cy5) conjugated antibodies. DAPI staining and a background image was  
121 acquired in the beginning of each cycle for quality control and image processing. After rudimentary  
122 image processing (including illumination correction, distortion, stitching and registration) 6) we  
123 performed cell segmentation and single cell densitometry analysis. 7) We assessed the image quality  
124 of each core and removed 48 cores with insufficient quality. 8) We corrected possible batch effects  
125 between the five slides applying affine matrix transformations using an averaged distribution of  
126 protein intensities as reference for each protein marker. 9) Finally, we performed core and single cell  
127 analysis of the markers and performed model calculations within different cell populations.

128 This delivered a total of 54.6 million protein profiles (Figure 1B) in a total of 2.4 million cells which  
129 were used for cell identity analysis, construction of a tissue atlas of apoptotic proteins profiles, intra-  
130 and inter-tumor heterogeneity analysis, spatial tissue analysis as well as single cell systems modelling.

131 Cell DIVE™ and cell segmentation analysis identified on average 6,492 (SD 1,228) cells per tissue  
132 microarray (TMA) core; totaling on average 14,414 (SD 4,196) cells per patient (1 to 3 cores; Figure  
133 1B). Cells were classified into different cell types based on cell identity markers for cancer/epithelial  
134 cells (positive for cytokeratin AE1 or PCK26), immune cells (positive for CD3, CD4, CD8 or CD45) and  
135 other stromal cells that were negative for any of these markers. For more extensive cell classification,  
136 a Random Forest model was trained with 15,184 manual annotated cells (0.6% of total cells) and CD3,  
137 CD4, CD8, CD45 and FOXP3, and applied on 99.9% of all cells to further differentiate immune cells into  
138 Cytotoxic, Regulatory, Helper T and other immune cells (Figure 1C). The model classified 65.7% as  
139 (epithelial like) cancer cells (type II error 3.0%; training set), 23.6% other stromal cells (type II error  
140 8.1%) and 10.7% as immune cells (type II error 3.0%), of which 2.0% were Helper (type II error 28.8%),  
141 1.4% Regulatory (type II error 7.4%), 1.3% Cytotoxic (type II error 28.0%) and 6.0% other T or immune  
142 cells (type II error 18.8%; Figure 1DE). Of note, the cell type composition in CRC core tissues varied  
143 significantly, with some cores showing predominantly cancerous/epithelial cells in the absence of  
144 immune cell infiltration, and others showing very high levels (up to 55%) of immune cells (Figure 1D).  
145 The median distribution of cells was 66.5% tumor, 7.8% immune and 22.2% stromal cells (Figure 1E).  
146 A bootstrap analysis with sampled pairings suggested that cell type composition in tumors of patients  
147 with paired-cores were, despite high heterogeneity, more similar to each other compared to random  
148 pairings. This suggests that cell type composition was a biological feature of individual tumors (Suppl.  
149 Figure 1).

## 150 **Tumor cell atlas shows heterogeneous and cell-type specific** 151 **enrichment of key proteins of the mitochondrial apoptosis pathway**

152 We next calculated molar protein profiles for proteins that are key to control MOMP and are used as  
153 input for the deterministic systems model, DR\_MOMP. For the calculations of protein profiles of  
154 individual cells, we normalized cell intensities to the mean intensity in HeLa cells and used previously  
155 established concentrations in HeLa cells as reference (Flanagan et al., 2015; Lindner et al., 2013).

156 Analysis of the five key BCL2 proteins that control the process of MOMP demonstrated a significant  
157 enrichment in anti-apoptotic BCL2 in immune cells when compared to cancerous epithelial cells or  
158 other stromal cells, while anti-apoptotic BCL(X)L and MCL1 although statistically enriched in cancer  
159 epithelial cells were more homogeneously distributed between the three cell types (Figure 2A-C). Mean

160 levels of MCL1 were in general lower compared to BCL2 and BCL(X)L, confirming previous studies  
161 (Lindner et al., 2013). Of note, pro-apoptotic BAK showed a strong enrichment in cancer cells  
162 (Figure 2A-C), while again BAX, although statistically enriched in cancer cells, was more homogenously  
163 distributed between the three cell types.

164 For PRO-CASPASE 3, PRO-CASPASE 9, SMAC and XIAP single protein profiling we converted the batch-  
165 corrected protein intensities to  $\mu\text{M}$  concentrations via alignment with reference distributions (Hector  
166 et al., 2012) using a pipeline that we previously developed (Salvucci et al., 2019a; Salvucci et al., 2017).  
167 Proteins that control executioner caspase activation downstream of MOMP also showed a  
168 heterogeneous distribution between cell types, with XIAP, SMAC, PRO-CASPASE 3 and PRO-  
169 CASPASE 9, all at higher levels in cancer cells when compared to immune cells (Figure 2D-F). Stromal  
170 cells showed the lowest levels of these proteins, suggesting that the apoptotic machinery downstream  
171 of MOMP is suppressed in non-transformed cells when compared to cancer epithelial cells.

172 Utilizing transcriptional data derived from flow-sorted immune ( $n = 6$ ), epithelial ( $n = 6$ ) and fibroblast  
173 ( $n = 6$ ) populations isolated from CRC primary tumor tissue (GSE39396 (Calon et al., 2012); Suppl.  
174 Table 2), we identified elevated levels of *bcl2* mRNA levels in leukocytes compared to cancer  
175 (epithelial) cells (ANOVA  $p = 0.006$ , Tukey post-hoc  $p = 0.005$ ) but also significantly higher levels of *bax*  
176 and *mcl1* mRNA levels in Leukocytes compared to cancer cells, and in Stroma (Fibroblasts) compared  
177 to cancer cells (ANOVA  $p \leq 0.01$ , Tukey post-hoc  $p < 0.01$ ; Suppl. Figure 2). We did not find any  
178 significant differences in mRNA levels of the *bak1*, *bcl2l1* (BCL(X)L), caspases, nor *xiap* between the  
179 cell populations.

180 Apoptotic protein profiles from approximate 115,923 identified T cells showed higher levels of BAK,  
181 XIAP, SMAC, PRO-CASPASE 3 and PRO-CASPASE 9 and lower levels of BCL2 in Cytotoxic T cells when  
182 compared to Helper or Regulatory T cells (Figure 3A-C). These findings suggests that Cytotoxic T cells  
183 may represent the T cells most sensitive to the activation of mitochondrial apoptosis.

184 As expected, cancer epithelial cells also showed higher levels of the glucose transporter GLUT1,  
185 sodium-potassium ATPase, the hypoxia-inducible factor-1 $\alpha$  (HIF-1a) target gene CA9, and the  
186 proliferation marker KI67, while HLA-A were enriched in immune cells (Figure 4AB). In contrast,  
187 protein levels of p70S6 kinase (S6) were more evenly distributed across all cell types. Calculating the  
188 cores' quartile coefficients of dispersion (COD; Suppl. Figure 3), a measure of the spread of the protein  
189 levels, we found that immune cells had a greater COD for BCL2 and BAK compared to cancer and  
190 stroma cells. Stroma cells showed the highest, and cancer epithelial cells the lowest, COD for MCL1,

191 APAF1 and PRO-CASPASE 3. Cancer cells showed greater CODs of SMAC, GLUT1 and KI67 protein levels  
192 compared to immune and stroma cells.

193 Correlation analysis (Figure 4C-D) of the 1,556,581 cancer cells demonstrated high, positive median  
194 Spearman's correlation coefficients ( $p > 0.5$ ) between BAK and BAX levels. Levels between BAK (and  
195 BAX) and PRO-CASPASE 3 (and PRO-CASPASE 9), BCL(X)L and BCL2, PRO-CASPASE 3 and BCL2, BCL2  
196 and MCL1, BCL2 and XIAP, SMAC and BCL(X)L, PRO-CASPASE 3 and PRO-CAPSASE 9, and PRO-  
197 CASPASE 3 and XIAP had high positive median correlation coefficients in cancer and stromal, but not  
198 immune cells. The Spearman's correlation coefficient between BCL(X)L and MCL1, CA9 and XIAP, and  
199 SMAC and XIAP levels was  $> 0.5$  in all cells. Comparing GLUT1 to apoptosis protein levels returned  
200 coefficients around 0, but showed greater values when compared to HLA-A and CA9 in cancer cells.  
201 HLA-A levels correlated with PRO-CASPASE 3 levels only in stromal cells. Generally, correlations  
202 between individual proteins were nearly identical in leukocytes and stromal cells and frequently  
203 differed from those in cancer cells, validating at the single cell level that transformed cells deviate  
204 from a physiological regulation of apoptotic and metabolic pathways.

## 205 **Single cell systems modelling of apoptosis sensitivity shows inter-** 206 **individual differences in apoptosis sensitivity and an enhanced** 207 **ability of tumor cells to undergo Caspase-3-dependent** 208 **mitochondrial apoptosis**

209 Next, we used quantitative single cell protein profiles to predict the apoptosis sensitivity of the  
210 1.6 million colorectal tumor cells. We employed two systems models of the mitochondrial apoptosis  
211 pathway that were previously established and experimentally validated in our group to predict the  
212 intrinsic ability of cells to initiate and execute apoptosis. DR\_MOMP (Flanagan et al., 2015; Lindner et  
213 al., 2013; Lindner et al., 2017) calculates the sensitivity of cells to undergo mitochondrial  
214 permeabilization by computing a score that, in summary, quantifies the amount of pro-apoptotic BH3-  
215 only proteins required to trigger sufficient BAK or BAX pore formation to induce mitochondrial outer  
216 membrane permeabilization (MOMP) during genotoxic stress (Figure 5A). In contrast, APOPTO-CELL  
217 (Huber et al., 2007; Rehm et al., 2006) calculates the amount of caspase 3 mediated substrate cleavage  
218 as a consequence of MOMP and apoptosome formation (Figure 5A).

219 Using the quantitative Bcl-2 protein profiles of BAK, BAX, BCL2, BCL(X)L and MCL1 as model input for  
220 DR\_MOMP, we were able to calculate the sensitivity of individual tumor cells to the process of  
221 mitochondrial apoptosis initiation. Calculating mean DR\_MOMP scores for each core (Figure 5B, top)  
222 and % cells with low sensitivity for MOMP for individual core (Figure 5B, bottom) using the calculated



223 average stress dose of the population as threshold (Flanagan et al., 2015; Lindner et al., 2013; Lindner  
224 et al., 2017), we were able to show significant differences in % cells with low sensitivity for MOMP in  
225 this otherwise homogeneous cohort of stage III CRC patients. Between patient-matched cores, we  
226 found a mean difference of  $18.8\% \pm \text{SD } 14.1\%$  and a mean SD of  $14.0\%$  cells with low sensitivity for  
227 MOMP. When stratifying DR\_MOMP calculations for individual cell types, we found that, on average,  
228 significantly fewer cancer cells and stromal cells exhibited low sensitivity for MOMP when compared  
229 to immune cells (Figure 5C, upper). Among immune cells, Regulatory T cells were found to have largest  
230 population of single cells with low sensitivity for MOMP (Figure 5C lower). And, in line with our analysis  
231 on protein level (Figure 3), we found that cytotoxic T cells are overall significantly more susceptible to  
232 apoptosis stimuli compared to other immune cells. Figure 5D depicts examples of DR\_MOMP  
233 predictions in cores with a majority of cells having a high sensitivity for MOMP (left) or a majority of  
234 cells having low sensitivity for MOMP (right).

235 When investigating the sensitivity of individual tumor cells to undergo caspase 3 activation (once the  
236 process of MOMP is activated) using the APOPTO-CELL systems model, we similarly found significant  
237 differences between individual patients (Figure 5E, top) and cores (Figure 5E, bottom): Between  
238 patient-matched cores we found a mean difference of  $18.8\% \pm \text{SD } 15.7\%$  and a mean SD of  $13.8\%$  cells  
239 with low predicted caspase activity. Importantly, when investigating individual cell types, we found  
240 that cancer cells were predicted to show a higher caspase activity compared to immune cells and  
241 stromal cells, with the latter showing the greatest fraction of cells with low predicted caspase activity  
242 (Figure 5F). Figure 5G depicts examples of cores with APOPTO-CELL predicting the majority of cells  
243 showing high caspase activity (left) or the majority of cells exhibiting low caspase activity (right).

244 The activation of mitochondrial (or intrinsic) apoptosis is considered to be a two-step process, with  
245 little feed-back from one to the other process (Ichim and Tait, 2016). The multiplexing, quantitative  
246 protein profiling and single cell systems modelling pipeline developed here hence also allowed us to  
247 address the question of whether cancer cells show differences in their ability to activate each of these  
248 two apoptotic control points.

249 In line with the latter analysis, assessing apoptosis sensitivity up- and downstream of MOMP showed  
250 that cancer cells are sensitive for both apoptosis pathways in the majority of tumors and that only a  
251 small fraction of cores showed low sensitivity in both pathways at the same time (Figure 6A). In  
252 contrast, immune and stroma cells had a higher fraction of cells that showed low sensitivity in both  
253 pathways, and a lower fraction of cells that showed high sensitivity in both, compared to cancer cells  
254 (Figure 6AB). Of the cancer of cells that show low sensitivity in one and high sensitivity in the other  
255 pathway, we found that a majority of cancer cells showed a low MOMP sensitivity and a predicted

256 high caspase activity (Figure 6A-C). In contrast, the majority of immune cells showed a predicted high  
257 caspase activity but a low sensitivity for MOMP (Figure 6A-C), and the majority of stroma cells showed  
258 a high sensitivity for MOMP but a predicted low caspase activity (Figure 6A-C). Collectively, the data  
259 suggested that the majority of cancer cells showed a high sensitivity for at least one of the two  
260 apoptosis pathways, and that cancer cells were overall more likely to respond to both signaling  
261 pathways when compared to immune or stromal cells.

## 262 **Analysis of intra-tumoral heterogeneity**

263 While investigating apoptosis sensitivity at the single cell level using our systems models, we also  
264 noticed that certain patients showed a significant intra-tumor heterogeneity among cancer cells, while  
265 other patients showed a more homogenous distribution in model predictions (Figure 5BE). To further  
266 investigate such intra-tumoral heterogeneity, we assessed the Shannon Entropy between the models  
267 in each core to measure the unanimity of single-cell predictions. A low entropy, close to zero, suggests  
268 homogenous model predictions among all cells, which could either indicate systemic sensitivity or  
269 systemic resistance. In contrast, higher values suggest a more heterogeneous, or random,  
270 configuration of cell states, indicating a high diversity in distinct cells populations (Figure 7A). Overall,  
271 we did not find a significant difference in model predictions with the majority of cores having high  
272 entropy ( $> 0.5$ ) for both models (Figure 7A). However, the cell composition of different cores may bias  
273 the calculation if not stratified for cell types. While the difference was small, cancer cells and immune  
274 cells had significantly lower entropy compared to stroma cells for DR\_MOMP (Figure 7B). We found  
275 something similar for the predictions of the APOPTO-CELL model, however, the difference between  
276 cancer and immune cells was much more distinct (Figure 7C). Studying the entropy of protein levels  
277 using histograms (normalized bin size = 0.1 SD) in cancer cells (Figure 7D), suggested the highest  
278 entropy in BCL2 and the lowest entropy in MCL1 if comparing protein relevant for DR\_MOMP. Among  
279 proteins relevant for APOPTO-CELL, we found the highest entropy in XIAP and the lowest PRO-  
280 CASPASE 3. Overall, cancer epithelial cells showed higher entropy in levels of all proteins but BCL(X)L  
281 and PRO-CASPASE 3 when compared between epithelial cancer, immune and stroma cells (ANOVA  $p$   
282  $< 0.05$ , Tukey post-hoc  $p < 0.05$ ; Suppl. Figure 5). Figure 6D depicts examples of low (left) and high  
283 (right) entropy. On average, protein levels of most proteins were greater in cancer compared to  
284 immune and stroma cells (Figure 2) which allows more states and leads naturally to high entropy in  
285 cancer cells.

286 We also assessed the presence of systematic spatial variation of protein levels and model predictions  
287 (spatial autocorrelation) by measuring Moran's I in each core (Figure 7F-J). A Moran's I of 1 indicates  
288 a perfect spatial separation (e.g. left *versus* right separation), while a value of -1 indicates a perfect

289 dispersion (checkerboard pattern; Figure 7F). A Moran's I is close to zero for a random distribution.  
290 Figure 6G depicts examples of low (left) and high (right) Moran's I.

291 Overall, we found little evidence of strong spatial autocorrelation or spatial separation in the majority  
292 of cores suggesting that cells that were close to each other did not have similar protein levels or similar  
293 apoptosis sensitivities. Overall, we did not find any statistically significant difference in Moran's I  
294 between the different apoptosis models (Figure 7H). Similar to the Entropy, this value is biased if cells  
295 of different types are spatial separated, and Moran's I needs to be studied individually. Although we  
296 observe only minor difference for the DR\_MOMP model (Figure 7I), cancer cells with different  
297 predictions for APOPTO-CELL were significantly more randomly dispersed compared to stromal cells  
298 (ANOVA  $p = 0.004$  and Tukey post-hoc  $p = 0.002$ ; Figure 7E).

299 Calculating Moran's I for cells' protein levels, we found that the majority of cancer cells have a score  
300 less than 0.2 suggesting a tendency towards a low correlation between protein level and the distance  
301 between cells (Figure 7K). However, individual cores showed high spatial clustering for individual  
302 protein suggesting that neighboring cells are more likely to have similar protein levels than distant  
303 cells in these cores. Among the proteins relevant for DR\_MOMP, BAX and BCL2 showed the higher  
304 Moran's I compared to BAX, BCL(X)L and MCL1 (Figure 7K). Among proteins used in the APOPTO-CELL  
305 model, SMAC had the lowest Moran's I compared to PRO-CASPASE 3, 9 and XIAP (Figure 7K). Of note,  
306 since immune cells are more mobile than epithelial or stroma cells, we would assume to find the  
307 lowest Moran's I in these cells. However, this was only the case for BAK, BCL2, PRO-CASPASE 3 and  
308 GLUT1 (Suppl. Figure 6). While numerically different, overall the Moran's I was similar for BAX,  
309 BCL(X)L, MCL1, SMAC and CA9 if stratified for cell types. We observed the greatest difference between  
310 cells of different types for BAK, BCL2, GLUT1, HLA-I and KI67 (Suppl. Figure 6).

311 Collectively, intra-tumoural heterogeneity in apoptosis signaling was surprisingly not increased in  
312 cancer cells when compared to leukocytes and other stromal cells, suggesting that heterogeneity in  
313 apoptosis signaling represents an intrinsic, non-genomic cell property that is not increased by the  
314 process of malignant transformation.

## 315 Discussion

316 The present study constitutes the first report describing the quantitative and spatial distribution of  
317 key mitochondrial apoptosis proteins at single cell resolution in intact cancer tissue. Using multiplexed  
318 immunofluorescence imaging (MxIF) we provide information on 2.4 million apoptosis protein profiles  
319 in six different cell types and deliver the first atlas of apoptosis signaling proteins in a large cohort of

320 patients (164 colorectal cancer patients). We furthermore conducted a systems-based analysis of each  
321 individual cell's apoptosis sensitivity. Our dynamic systems modelling estimated that cancer cells were  
322 generally more sensitive to apoptosis signaling than immune or stromal cells, however with significant  
323 heterogeneity between patients. We also characterized the level of intra-tumoral heterogeneity in  
324 apoptosis signaling in colorectal cancer, and demonstrate that intra-tumoral heterogeneity in  
325 apoptosis signaling was not increased in cancer cells when compared to leukocytes and other stromal  
326 cells.

### 327 **Apoptosis protein mapping in colorectal cancer and its implication for future therapy**

328 Our first analysis steps constituted the mapping of protein profiles to the different cell types present  
329 in the tumor microenvironment. Multiplexed protein imaging has been increasingly used as a tool for  
330 spatial analysis of tumor cell types and microenvironment over the last 10 years (Angelo et al., 2014;  
331 Gerdes et al., 2013; Goltsev et al., 2018; Gut et al., 2018; Kalra and Baker, 2017; Rashid et al., 2019;  
332 Saka et al., 2019; Tan et al., 2020) and there are increasing number of multiplexing methods for in situ  
333 RNA and DNA detection (Decalf et al., 2019; Kishi et al., 2019; Moffitt and Zhuang, 2016), Cell DIVE has  
334 been used to analyze tumor cell heterogeneity in CRC (Badve et al., 2021; Spagnolo et al., 2017), ductal  
335 carcinoma *in situ* (DCIS) (Badve et al., 2021; Gerdes et al., 2018), breast cancer (Sood et al., 2016),  
336 glioma and glioblastoma (Berens et al., 2019) and melanoma (Yan et al., 2019). Unlike standard  
337 immunohistochemistry methods which are limited to 1-5 markers in a single section, multiplexed  
338 immunofluorescence imaging methods can provide single cell data on up to 60 proteins in a single  
339 sample, including cell spatial coordinates, thus allowing analysis of co-expressed biomarkers and  
340 relationships between cells types and functional status, as described in this paper.

341 Overall, we found that the 'average protein level' in a core (of the proteins we investigated), as  
342 evaluated in bulk assays, is predominantly due to by the signal from cancer cells compared to immune  
343 or stroma cells (Figure 2BE). However, among the analyzed key proteins regulating mitochondrial  
344 apoptosis, we found interesting differences between the cell types (Figure 2AD). One of the key  
345 findings was an enrichment in BCL-2 protein levels in immune cells when compared to cancer and  
346 other stromal cells. This finding may have important implications regarding the use of BCL2  
347 antagonists such as Venetoclax for the treatment of solid tumors. Venetoclax is well tolerated in  
348 patients with relatively few side effects and would represent an ideal adjuvant and sensitizer to  
349 chemotherapy for the treatment of chemotherapy-resistant solid tumors.

350 Nevertheless, Rohner *et al.* (Rohner *et al.*, 2020) have previously shown that inhibition of BCL2 by ABT-  
351 199 caused cell death in all types of lymphocytes but specifically reduced the counts of B cells in

352 humans. In addition, the authors showed that while T cells showed equivalent high levels of BCL2,  
353 latter were significantly less affected compared to B cells, emphasizing that triggering apoptosis is “the  
354 sum of the interplay of a network of anti- and pro-apoptotic BCL-2 family members” (Rohner et al.,  
355 2020) and highlighting the importance of a systematical assessment of apoptosis. Our data suggest  
356 that in certain patients BCL2 is also highly expressed in epithelial cancer cells, which could suggest that  
357 BCL2 antagonist therapy may effectively reduce the overall anti-apoptotic threshold of cancer cells.  
358 Due to complexity in cell-type specific BCL2 expression, our study suggests that evaluation of BCL2  
359 levels in bulk tissues samples may not be sufficient as a stratification tools for BCL2 antagonists.

360 We found that MCL1 levels were enriched in epithelial and immune cells, with significantly lower levels  
361 in stroma tissue. As MCL1 antagonists are also being currently developed as apoptosis sensitizers for  
362 MCL-1-dependent cells, effects of MCL1 antagonists on immune cells may also need to be considered.  
363 Of note, quantitatively, MCL1 levels were lower in cancer cells when compared to the anti-apoptotic  
364 proteins BCL2 and BCL(X)L. Another interesting aspect of our study was the strong enrichment of BAK  
365 in cancer cells. Recently, agents have been developed that activate BAX and BAK directly (Walensky  
366 and Gavathiotis, 2011), including molecules that do not interact with the BH3-binding pocket of anti-  
367 apoptotic proteins or pro-apoptotic BAK and induces cell death in a BAX-dependent fashion  
368 (Gavathiotis et al., 2012; Gavathiotis et al., 2008). Our results suggest that BAK in particular is a good  
369 target in colorectal cancer. Cancer cells also had significant higher levels of SMAC, XIAP and PRO-  
370 CASPASE 9 compared to immune or stroma cells. It is therefore possible that colorectal tumors  
371 expressing high XIAP levels in cancer cells are effectively sensitized by SMAC mimetics (Fichtner et al.,  
372 2020), however analysis of both XIAP and SMAC levels may be required for future patient  
373 stratification.

### 374 **Priming of cancer cells and the degree of inter-individual heterogeneity**

375 We also utilized the protein profiles for calculations of apoptosis sensitivity at the systems level.  
376 Because of the complexity of apoptosis signaling with multiple signaling redundancies and feed-back  
377 signaling, several groups have developed functional or computational models that describe apoptosis  
378 sensitivity on a systems level. One such as approach, termed ‘*BH3-profiling*’, interrogates the response  
379 of the mitochondrial apoptosis pathway to pro-apoptotic BH3-only protein peptide mimetics (Certo  
380 et al., 2006; Del Gaizo Moore and Letai, 2013; Montero and Letai, 2018). However, this technique  
381 requires fresh tissue and living cells. To enable analysis of fresh frozen or formalin-fixed paraffin-  
382 embedded tissue, we developed DR\_MOMP (Lindner et al., 2013) as an ODE-based model of MOMP  
383 that, similarly to BH3 profiling, calculates the response of the BCL2 signaling network to BH3-only  
384 proteins activated upon cellular stress (Flanagan et al., 2015; Lindner et al., 2013; Lindner et al., 2017).

385 It has been extensively validated experimentally in colon and other cancer cells (Lindner et al., 2013;  
386 Lindner et al., 2017; Lucantoni et al., 2018). Furthermore, we developed APOPTO-CELL as an ODE  
387 model that calculates the sensitivity of cells to activate caspase-3 downstream of MOMP (Huber et al.,  
388 2007; Rehm et al., 2006), as this process represents an important second control step. APOPTO-CELL  
389 has also been extensively validated in-house using single cell imaging and population-based  
390 approaches in cervical, colorectal and glioblastoma cells (Murphy et al., 2013; Salvucci et al., 2019a;  
391 Salvucci et al., 2017; Schmid et al., 2012). Both models have also been shown to predict responses to  
392 apoptosis sensitizers in preclinical settings (Lucantoni et al., 2018; O'Farrell et al., 2020). Our study  
393 supports the previously developed concept that tumor cells are indeed 'primed' to undergo  
394 mitochondrial apoptosis (Llambi et al., 2011; Ni Chonghaile et al., 2011). Including additional markers  
395 for BH3-only proteins and caspase-independent cell death pathways will allow us to gain a more  
396 holistic picture of possible cell fates in the future.

397 However, a surprising observation was that (based on model prediction) this appeared to result  
398 predominantly from an enhanced ability to overcome both apoptosis barriers, MOMP and activation  
399 of caspase-3 activation downstream of MOMP, as immune cells lack sensitivity for MOMP and other  
400 stromal cells showed less sensitivity to caspase-3 activation (Figure 6AC). When comparing the ability  
401 to undergo MOMP, cancerous cells were equally sensitive to stromal cells to undergo MOMP. In  
402 contrast, immune cells appeared to be highly resistant to MOMP due to their relatively high expression  
403 of increase in BCL2. Interestingly, we found that cytotoxic (CD8+) T cells were overall significantly more  
404 susceptible to apoptosis stimuli compared to other immune cells. This is clinically relevant since tumor  
405 infiltration by cytotoxic T Cells has been found to be significantly positively correlated with better  
406 survival in colorectal cancer (Naito et al., 1998). In patients with breast cancer, changes in the ratio  
407 between FOXP3+ (Regulatory) and CD8+ (cytotoxic) T cells (before and) after neoadjuvant  
408 chemotherapy was highly associated with clinical response (Ladoire et al., 2008). Similarly, a low  
409 density of cytotoxic T Cells in tumor tissue after chemotherapy was associated with poor response in  
410 patients with rectal cancer (Matsutani et al., 2018). Therefore, increased risk of apoptosis of cytotoxic  
411 T cells (e.g. following chemotherapy) may abrogate these benefits.

412 Nevertheless, our study cannot address the questions whether cancer cells are capable of activating  
413 more BH3-only proteins at a given genotoxic (or metabolic) stress dose. We also observed significant  
414 patient-to-patient heterogeneity in apoptosis sensitivity at both levels, while core-to-core differences  
415 within single patients were less pronounced. Moreover, our combined analysis of both apoptosis  
416 signaling pathways in each individual cell also allowed us to investigate potential blocks in either of  
417 these pathways. Our combined analysis showed that the majority of cancer cells showed a high



418 sensitivity for at least one of the two apoptosis pathways up- and downstream of MOMP, which was  
419 not observed to a similar degree in immune or other stromal cells.

## 420 **Intra-tumoral heterogeneity**

421 One of the limitations of the current study was that tumor core regions were analyzed, while tumor  
422 margins in the invasive zone were not investigated. However other studies have pointed to the  
423 importance of core regions in tumor progression due to silencing/methylation as a consequence of  
424 tissue hypoxia (Thienpont et al., 2016). Based on this and other previous studies pointing to an  
425 importance of intra-tumor heterogeneity in tumor progression and resistance, we also investigated  
426 intra-tumor heterogeneity in apoptosis signaling. Collectively, our entropy and spatial image analyses  
427 of the mitochondrial apoptosis pathway did not suggest that cancer cells showed an increased cell-to-  
428 cell or spatial heterogeneity when compared to immune or other stromal cells. However, as shown in  
429 the examples for Moran's I (Figure 7G), there can be a significant difference between the value of 0.0  
430 and 0.2 and assessing autocorrelation with alternative methods, such as Variograms, may be of  
431 benefit. Another limitation was that we resolved the cell's phenotype in only three classes. Observed  
432 heterogeneity in predicted model response and measured protein levels could arise through a high  
433 number of various differentiated cells, and cells of the same type might have significantly lower  
434 heterogeneity if compared among each other. Notwithstanding these limitations, our studies indicate  
435 that intra-tumoral heterogeneity in apoptosis signaling was not increased in cancer cells, suggesting  
436 that this represents an intrinsic, non-genomic property not increased by the process of malignant  
437 transformation. This observation is supported by earlier studies in cell lines which demonstrated the  
438 importance of non-genomic heterogeneity in apoptosis signaling due to fluctuations in protein levels  
439 over the lifetime of a cell. Rehm *et al.* (Rehm *et al.*, 2009) reported that sibling cells underwent  
440 apoptosis execution within a narrow time window and that random cell pairs were significantly less  
441 synchronous in undergoing apoptosis, independent of activating the intrinsic or extrinsic pathway.  
442 However, the authors also reported that neither cell-to-cell distance nor cell membrane contacts  
443 influenced the synchrony in apoptosis execution of sibling cells (Rehm et al., 2009). Similarly, Spencer  
444 *et al.* (Spencer *et al.*, 2009) previously showed that differences in the protein levels regulating  
445 apoptosis are the primary causes of cell-to-cell variability in probability of death, with the protein state  
446 being transmitted from mother to daughter, and protein synthesis rapidly promoting divergence  
447 between these cells.

448 While we here consider the levels of 9 apoptosis markers, we did not take into account proteins' state  
449 such as BCL2's phosphorylation status (Ruvolo et al., 2001) nor subcellular localization of proteins  
450 which is possible to account for with the Cell DIVE™ platform. For example, BAX's localization at the

451 mitochondria or in the cytosol was reported to be clinically relevant in acute myeloid leukemia  
452 (Reichenbach et al., 2017) and hepatocellular carcinoma (Funk et al., 2020). BAX localization could be  
453 considered by including a mitochondrial marker, or by analyzing the BAX signal within the cytosolic  
454 cell mask, with an evenly distributed signal suggesting cytosolic localization, and uneven distribution  
455 suggesting localization at mitochondria.

456 In conclusion, our study provides the first map of apoptosis sensitivity at individual protein and  
457 systems level in intact colorectal cancer tissue. We holistically describe both patient-to-patient and  
458 intra-tumor heterogeneity in apoptosis signaling in stroma, immune and cancer cells which has  
459 important implications for the future use of apoptosis sensitizers in the treatment of colorectal cancer.

## 460 **Acknowledgments**

461 This work was funded by a US-Northern Ireland-Ireland Tripartite grant from Science Foundation  
462 Ireland and the Health Research Board to JHMP (16/US/3301) and the National Cancer Institute  
463 (Systems Modeling of Tumor Heterogeneity and Therapy Response in Colorectal Cancer; to FG). EPO'C  
464 is support by an RCSI Bon Secours Hospital MD StAR fellowship and the Beaumont Hospital Cancer  
465 Research and Development Trust. DBL, PD, ML, XS were supported by US-Ireland R01 award (NI  
466 Partner supported by HSCNI, STL/5715/15).

## 467 **Author Contributions**

468 AUL, MS, EMcD, SaCh, StCa, DPO'C, ADC, ASP, PLP, ML, AS, AS and JFG were involved in methodology,  
469 data validation and curation. EMcD, SaCh, ADC, ASP, AS, JFG and FG performed the Cell DIVE  
470 processing as well as cell segmentation and single cell quantification. AUL and MS statistically analyzed  
471 the data and study investigation. JPB, DAmcN, SVS, JHMP, PLP, PD and DBL were involved in clinical  
472 sample acquisition and data collection. EMcD AC and ASP conducted the sample imaging and image  
473 processing. ASP and AS led the single cell analysis workflows for epithelial and immune cell analysis.  
474 StCa and MF grow and processed the control cell lines. AUL, MS, JFG, SaCh, DBL, XS, FG and JHMP  
475 reviewed the data. AUL, MS, MR, DBL, FG and JHMP designed experiments. AUL and JHMP wrote the  
476 manuscript. AUL created the manuscript figures. MR, DBL, FG and JHMP were involved in funding  
477 acquisition. All Authors edited and revised the manuscript text.



## 478 **Declaration of Interests**

479 The Cell DIVE™ platform was developed by GE Research. Sanghee Cho, Elizabeth McDonough, Anup  
480 Sood, John Graf, Alberto Santamaria-Pang, Alex Corwin and Fiona Ginty are all current and former  
481 employees of GE Research. The other authors have no potential conflicts.

## 482 **Figure titles and legends**

483 Figure 1 – (A) Simplified workflow of the Cell DIVE™ platform and data analysis. (B) In total over 2  
484 million cells, stratified into cancer, immune and stroma classes were analyzed. (C) Random forest was  
485 used to differentiate cells using DAPI, and epithelial and CD markers. (D) The majority of cores  
486 consisted of epithelial like cancer and stroma cells, (E) with less than 20% of cells being immune cells  
487 in the majority of cores (ANOVA, Tukey post-hoc).

488 Figure 2 – Protein analysis of apoptosis proteins relevant for (A-C) the DR\_MOMP model upstream of  
489 MOMP and (D-F) the APOPTO-CELL model downstream of MOMP. (AD) To determine the difference  
490 between protein quantification based on cell masks and quantification using the whole image, we first  
491 determined the median protein concentration of each core, stratified for cancer (red), immune (blue)  
492 and stroma (gray) cells (ANOVA, Tukey post-hoc). x marks panels with cropped high value outliers.  
493 (BE) Subsequently, we compared the median pixel intensity of the core images (x-axes) with the  
494 stratified median pixel intensities determined using cell masks (y-axes) before batch correction. The  
495 scatter size indicates the numbers of stratified cells of the respective core. The panels C and F show  
496 examples of the pre-batch corrected protein staining, cell type classification and batch corrected mean  
497 cell intensities using cell masks.

498 Figure 3 – Global immune cell protein analysis of apoptosis proteins relevant for (A-C) the DR\_MOMP  
499 model upstream of MOMP and (D) the APOPTO-CELL model downstream of MOMP (ANOVA, Tukey  
500 post-hoc). (B) Virtual IHC staining with BCL2 (red), CD3 (green) and CD45 (blue) shows that BCL2 level  
501 vary largely between immune cells.

502 Figure 4 – (A) Protein analysis of KI67, CA9, GLUT1 and HLA\_I proteins using core median protein levels  
503 and stratified for cancer (red), immune (blue) and stroma (gray) cells (ANOVA, Tukey post-hoc). (B)  
504 We compared the median pixel intensity of the core images (x-axes) with the stratified median pixel  
505 intensities determined using cell masks (y-axes) before batch correction. The scatter size indicates the  
506 numbers of stratified cells of the respective core. We calculated the median spearman correlation  
507 coefficient between proteins, stratified for (C) cancer, (D) immune and (E) stroma cells. A more  
508 detailed correplation plot, including inter quantile ranges, is provided as supplementary figure 4.

509 Figure 5 – Results of the cell-by-cell analysis using the apoptosis models DR\_MOMP (Lindner et al.,  
510 2013) and APOPTO-CELL (Huber et al., 2007; Rehm et al., 2006). (A) Graphical illustration of the  
511 modelled BCL2 pathway (DR\_MOMP) upstream of MOMP and the modelled caspase pathway  
512 (APOPTO-CELL) downstream of MOMP. We first analyzed (B-D) DR\_MOMP and subsequently (D-G)

513 APOPTO-CELL. (BE) First we determined model predictions of required stress to induce MOMP  
514 (DR\_MOMP) and % substrate cleavage upon MOMP (APOPTO-ELL) based on aggregated mean protein  
515 level for each patient, using the pool of all cells of multiple cores. Subsequently we calculated the  
516 cores' cell fractions with (B) high/low sensitivity for MOMP (DR\_MOMP) and (E) high/low substrate  
517 cleavage (APOPTO-CELL) using individual cell protein levels. We compared cores' fractions with  
518 high/low (C) sensitivity for MOMP and (F) caspase activity stratified for cancer (red), immune (blue)  
519 and stroma (gray) cells (ANOVA, Tukey post-hoc). The panels D and G show examples of individual  
520 cores with high/low (D) sensitivity for MOMP and (G) caspase activity. In B and E, cores were sorted  
521 from high apoptosis sensitivity (left) to low apoptosis sensitivity (right), respectively.

522 Figure 6 – We determined cores' cells that (A) exclusively showed high sensitivity for MOMP (left), high  
523 caspase activity, high responses in both apoptosis pathways and low responses in both apoptosis  
524 pathways (right; ANOVA, Tukey post-hoc). (BC) Ternary plot of individual core's cell fraction for  
525 exclusively pathway responses or sensitivity in both pathways. Overall, cancer cells show high  
526 sensitivity for the DR\_MOMP modelled BCL2 pathway upstream of MOMP with about half showing  
527 also high caspase activity modelled by APOPTO-CELL. Stroma cells showed exclusively high sensitivity  
528 for the apoptosis pathway upstream for MOMP while immune cells showed exclusively high sensitivity  
529 for MOMP.

530 Figure 7 – Heterogeneity analysis calculating cells' (A-E) Entropy and (F-K) Moran's I for apoptosis  
531 model predictions as well protein levels. (A-E) Entropy (information theory) is a measurement for the  
532 bias to one state, (A) with low entropy marking captancy for a one state and high entropy marking  
533 uncertainty for one or multiple states. We first determined the binary Shannon entropy for (B)  
534 low/high sensitivity for MOMP (DR\_MOMP) and (C) low/high caspase activity (APOPTO-CELL; ANOVA,  
535 Tukey post-hoc), finding surprisingly significant lower entropy in cancer cells (red) compared to  
536 immune (blue) and stroma cells (gray). (D) Subsequently, we calculated the Shannon Entropy for the  
537 proteins using bins for protein level with a bin width of z-score = 0.1 SD for each protein respectively.  
538 The calculated Shannon Entropy for stroma and Immune cells can be found in supplementary figure 5.  
539 (E) shows examples with low (left) and high (right) entropy for the DR\_MOMP model. (F) Moran's I is  
540 a measurement of spatial autocorrelation with a Moran's I approaching 0 and < 0 indicating spatial  
541 dispersion and a Moran's I approaching 1 marking spatial clustering. Panel G shows examples of  
542 protein levels with low (left) and high (right) Moran's Is. (G-K) We determined cores' Moran's I for  
543 low/high (I) sensitivity for MOMP, (J) caspase activity and (K) respective protein levels (in cancer cells).  
544 Calculated Moran's I for Stroma and Immune cells can be found in supplementary figure 6. (G) While

545 a Moran's I around 0 shows no spatial autocorrelation, values around 0.2 or greater indicate presence  
546 of local spatial autocorrelation within the cores.

## 547 STAR★Methods

### 548 Key Resource Table

| REAGENT or RESEOURCE | SOURCE                                              | IDENTIFIER or CONTACT |               |
|----------------------|-----------------------------------------------------|-----------------------|---------------|
| <b>Antibodies</b>    |                                                     |                       |               |
| APAF-1               | Millipore                                           | 2E12                  | MAB3053       |
| Bak                  | Cell Signaling                                      | D4E4                  | 12105         |
| Bax                  | Abcam                                               | E63                   | ab216985      |
| BCL-2                | Lifespan                                            | 124                   | LS-C389442    |
| Bcl-xL               | Thermo                                              | 7D9                   | MS-1334       |
| CA9                  | Thermo                                              | polyclonal            | PA1-16592     |
| Caspase-3            | Cell Signaling                                      | D3R6Y                 | 14214         |
| Caspase-9            | Santa Cruz                                          | 96.1.23               | sc-56076 A647 |
| CD3                  | Dako                                                | F7.2.38               | M7254         |
| CD4                  | Abcam                                               | EPR6855               | ab181724      |
| CD8                  | Dako                                                | C8/144B               | M7103         |
| CD45                 | Dako                                                | 2B11 + PD7/26         | M0701         |
| Cytokeratin AE1      | eBioscience                                         | AE1                   | 14-9001       |
| Cytokeratin PCK26    | Sigma                                               | PCK26                 | C1801         |
| FOXP3                | Biolegend                                           | 206D                  | 320014        |
| Glut-1               | Abcam                                               | EPR3915               | ab196357      |
| HLA I                | Abcam                                               | EMR8 5                | ab70328       |
| Ki67                 | Zeta                                                | SP6                   | Z2031         |
| MCL-1                | Abcam                                               | Y37                   | ab186822      |
| NAKATPase            | Abcam                                               | EP1845Y               | ab167390      |
| S6                   | Santa Cruz                                          | C-8                   | sc-74459 A647 |
| Smac                 | Cell Signaling                                      | 79-1-83               | 2954          |
| PD1                  | Abcam                                               | EPR4877(2)            | ab201825      |
| XIAP (API3)          | Thermo                                              | polyclonal            | APH937        |
| <b>Cell Lines</b>    |                                                     |                       |               |
| HCT-116 SMAC KO      | Dr. B Vogelstein (John Hopkins University, MD, USA) |                       |               |
| HCT-116 XIAP KO      | Dr. B Vogelstein (John Hopkins University, MD, USA) |                       |               |
| HeLa                 | American Type Culture Collection (LGC Standards)    |                       |               |
| JURKAT               | Dr. PH Krammer and Dr. H Walczak (DKFZ, Germany)    |                       |               |
| MCF7                 | Dr. RU Jänicke (University of Düsseldorf, Germany)  |                       |               |
| SKMEL                | DSMZ, Germany                                       | ACC 151               |               |

| REAGENT or RESEOURCE                                                     | SOURCE                                                               | IDENTIFIER or CONTACT |
|--------------------------------------------------------------------------|----------------------------------------------------------------------|-----------------------|
| <b>Biological Samples</b>                                                |                                                                      |                       |
| Stage III primary CRC tumour tissue resect prior 5-FU based chemotherapy | Beaumont Hospital (RCSI, IE)                                         | NA                    |
|                                                                          | Queen's University Belfast (UK)                                      | NA                    |
|                                                                          | Paris Descartes University (FR)                                      | NA                    |
| <b>Cell DIVE Platform</b>                                                |                                                                      |                       |
| Cell DIVE™                                                               | Cytiva; GE Research                                                  | fiona.ginty@ge.com    |
| Multi tumor tissue array                                                 | Pantomics                                                            | MTU 481               |
| <b>Software and algorithms</b>                                           |                                                                      |                       |
| R (3.6.3)                                                                | R Foundation                                                         | www.r-project.org     |
| Fiji (ImageJ; 1.51k)                                                     | Schindelin <i>et al.</i> (Schindelin et al., 2012)                   | www.fiji.sc           |
| GE SingleCellMetrics Plugin                                              | GE Research                                                          | fiona.ginty@ge.com    |
| Layers cell analysis software version 1                                  | GE Research                                                          | fiona.ginty@ge.com    |
| APOPTO-CELL                                                              | Rehm and Huber <i>et al.</i> (Huber et al., 2007; Rehm et al., 2006) | prehn@rcsi.ie         |
| DR_MOMP                                                                  | Lindner <i>et al.</i> (Lindner et al., 2013)                         | prehn@rcsi.ie         |
| MATLAB with the Statistics and Parallel toolboxes (version 2014b)        | The MathWorks                                                        | www.mathworks.com     |

## 549 **Resource Availability**

### 550 **Lead Contact**

551 Further information and request for code or resources should be directed to and will be fulfilled by  
552 the lead contact, Prof. Jochen Prehn (prehn@rcsi.ie).

### 553 **Materials Availability**

- 554 • This study did not generate new unique reagents.

### 555 **Data and Code Availability**

- 556 • Imaging data, cell masks and generated single cell measurements of 20 markers is available  
557 from the lead contact.
- 558 • The full pipeline for data analysis is available from the lead contact.
- 559 • Any additional information required to reproduce this work is available from the Lead Contact.

## 560 **Experimental Model and Subject Details**

561 This section does not apply to our computational study.

## 562 **Method Details**

### 563 **Colorectal cancer cohort**

564 Formalin-fixed, paraffin-embedded (FFPE) primary tumor tissue sections were obtained from  
565 170 chemotherapy-naïve, resected stage III CRC patients. Tumor samples were collected from three  
566 centers: Beaumont Hospital (RCSI, Ireland), Queen's University Belfast (UK) and Paris Descartes  
567 University (France). All centers provided ethical approval for this study and informed consent was  
568 obtained from all participants. A summary of the clinical characteristics of the cohort is provided in  
569 Suppl. Table 1. Data of 46 cores of 36 patients were dropped after quality assessment of the stained  
570 tissue (see below). All cores of two patients were removed in this process.

### 571 **Cell lines**

572 Three technical replicates (cores) of pellets of formalin-fixed HeLa, Jurkat, MCF7, SKMEL, HCT-116  
573 SMAC<sup>KO</sup> and HCT-116 XIAP<sup>KO</sup> cells in which quantities of mitochondrial apoptosis proteins were  
574 previously determined (Lindner et al., 2013; Passante et al., 2013; Rehm et al., 2006) were included in  
575 the construction of the tissue microarray (TMA) in parallel to the patients' cores, and served as quality  
576 control and internal standards for protein quantification. 3 of 18 cores of two cell lines were removed  
577 after quality control. Cells were grown to 80% confluence. Media was replaced 12-24 hours before  
578 fixation. To fix cells, cells were gently washed in sterile 1XPBS solution. Cell monolayers were covered  
579 with 5 mL 10% neutral-buffered formalin (NBF) for 2-5 min. Cells were scraped into NBF, and collected  
580 into labelled 50 mL tubes, and stored at 4 C for at least 3-4 hours. For further processing, cells were  
581 centrifuged at 1,200 rpm for 5 min and washed in 1% low melt agarose solution XBPS before re-  
582 suspension in 0.5 ml 80% ethanol and centrifugation at 12,000 rpm twice for 5 min. Subsequently 80%  
583 of ethanol was aspirated and cell pellets were molded into caps and frozen, prior to TMA construction.

### 584 **Antibody validation and conjugation**

585 Commercially acquired antibodies underwent multi-step process of validation and conjugation (as  
586 previously described by Gerdes *et al.* (Gerdes et al., 2013). Briefly, at least 2-3 clones for each target  
587 were stained in parallel using a multi-tissue array (MTU 481, Pantomics, CA) and staining performance  
588 visually compared. At least one antibody clone was down-selected for conjugation with either Cy3 or  
589 Cy5 bis-NHS-ester dyes. Epitopes were also tested for sensitivity to the dye inactivation solution (basic

590 hydrogen peroxide) by exposing multi-tissue arrays to 0, 1 and 10 rounds the solution and stained with  
591 the antibody of interest and compared. Approx. 10% of epitopes have been shown to have decreased  
592 signal following exposure to the inactivation solution and those antibodies are placed early in the  
593 multiplexing sequence (Gerdes et al., 2013). The key resource table shows the antibodies, clones and  
594 conjugates used in this study. Briefly the markers and staining rounds were as follows: Round 1: BCL2,  
595 APAF1; Round 2: MCL1, PRO-CASPASE-9; Round 3: S6, PRO-CASPASE-3; Round 4: BAX, SMAC; Round  
596 5: BAK, XIAP; Round 6: NaKATPase, BCL(X)L; Round 7: Cytokeratin PCK26, CD8; Round 8: Cytokeratin  
597 AE1, FOXP3; Round 9: CD4, Ki67; Round 10: HLA1, CD45; Round 11: Glut1, CA9; Round 12: CD3, PD1;  
598 Round 13: S6 (repeated). Note that in total, 9 background imaging rounds were also included.

## 599 **Immunofluorescence Imaging of Patient TMAs**

600 Multiplexed immunofluorescence iterative staining of the CRC TMAs was performed as previously  
601 described (Gerdes et al., 2013) using the Cell DIVE™ technology (Cytiva, Issaquah, WA; formerly GE  
602 Healthcare). This involves iterative staining and imaging of the same tissue section with 60+ antibodies  
603 and is achieved by mild dye oxidation between successive staining and imaging rounds. In total, there  
604 were 13 staining rounds using the antibodies described above and DAPI was imaged in each round.  
605 The Leica Bond (Leica Biosystems) was used for antibody staining and the IN Cell 2200 was used for  
606 imaging. Staining and image recording was repeated twice for S6 due to staining failure. Exposure  
607 times were set to fixed values for all images of a given marker-

## 608 **Image pre-processing**

609 Immunofluorescent images were processed and cells were segmented and quantified as described  
610 previously (Gerdes et al., 2013). To summarize, cells in the epithelial and stromal compartments were  
611 segmented using DAPI, pan-cytokeratin, S6, and NaKATPase stains (Gerdes et al., 2013). Images and  
612 segmented cell data then underwent a multistep review process (described by Berens et al. (Berens et  
613 al., 2019): 1) images were visually reviewed and manual scoring of tissue quality and segmentation  
614 was determined by at least one researcher. Images with poor quality staining or too few cells were  
615 excluded from data analysis; 2) cell filtering based on minimum and maximum number of pixels in  
616 each sub-cellular compartment (> 10 pixels and < 1500 pixels per compartment) and 1-2 nuclei per  
617 cell; cells with values outside these limits were removed 3) confirmation of excellent alignment of all  
618 cells in all staining rounds compared to the first round of staining. For this, an automated QC score  
619 was generated for every cell in each imaging round by correlating baseline DAPI images with all  
620 corresponding DAPI images from other multiplexing rounds. A perfect score of 1 indicated perfect  
621 registration, no cell loss and no cell movement. A score of 0 indicated complete loss of that cell after

622 baseline imaging. After quality control, cells included in the analysis had a median QC score of 0.95,  
623 with 53% having a QC score greater than 0.8. The average QC score was 0.57. In comparison, 83% of  
624 cells removed during quality control had a QC score less than 0.1 with an average QC score of 0.15.  
625 From the single-cell segmentation masks, the mean intensity, standard deviation, and coherent  
626 statistics were quantified for each protein with respect to the whole cell as well as xy-location. From  
627 the single-cell segmentation masks, the mean, standard deviation, median, and maximum staining  
628 intensity for each protein were quantified with respect to the whole cell, cell membrane, cytoplasm,  
629 and nucleus as well as cell location, area, and shape. Following quantification, slides were normalized  
630 for batch effects and exposure time for each channel/marker analyzed.

631 48 positions showing major cell loss during staining rounds were excluded from all analysis, as well as  
632 cells within the images' margins of 15 pixel on the x-axis and 10 pixel on the y-axes were dropped from  
633 all data analysis. 74 positions showing major or minor cell loss during staining rounds were excluded  
634 from training datasets for post-processing such as batch correction or cell classification.

## 635 **Post pre-processing and batch correction**

636 To correct for a possible batch effects between slides, cells' mean intensity were first normalized using  
637 upper-quantile normalization, grouped by protein marker and slide. Secondly, quantiles of the  
638 normalized intensities were plotted against their rankits, and an affine transformation matrices to  
639 rotate the function to the main diagonal were calculated. Obtained transformation matrices were  
640 applied on the intensities, and pixel intensity values were restored using linear regression and upper-  
641 quantile normalized values. Solely for the batch correction, cells within 5% of the images' margins  
642 were excluded for the calculation of the reference values. The batch correction was quality controlled  
643 with cell lines spotted in parallel to tissue samples on 3 of 5 slides.

## 644 **Immune Cell classification**

645 To differentiate cell types, we used CD3, CD4, CD8, CD45, FOXP3, PCK26 and Cytokeratin AE1 markers.  
646 We manually annotated 4,839 AE1- or PCK27-positive cells as (epithelial) cancer cells. Of 3,121 CD3-  
647 positive cells (Beare et al., 2008), 788 CD4-positive cells were annotated as Helper T cells (Beare et al.,  
648 2008), 991 CD8-positive cells were annotated as Cytotoxic T cells (Beare et al., 2008), and  
649 1,360 FOXP3-positive cells were annotated as Regulatory T cells (Hori et al., 2003). 3,369 CD3-negative  
650 cells that were either CD4-, CD45- or CD8-positive were annotated as other leukocytes. 3,837 cells  
651 that lacked any marker but were DAPI positive were annotated as stroma-rich cells (other stromal  
652 cells). Using the manual annotations, we constructed a random forest of 2,000 trees (R package  
653 *randomForest*, version 4.6-14) and employed it to classify all cells.



## 654 **Protein profiling and apoptosis sensitivity modelling**

655 Protein levels of BAK, BAX, BCL2, BCL(X)L and MCL1 were normalized to the mean protein levels in  
656 HeLa cells spotted in parallel to patients' core on 3 of 5 slides. Protein's molar concentrations were  
657 calculated using previously established HeLa concentrations (Lindner et al., 2013). The five proteins  
658 were used as input for the DR\_MOMP mathematical model (Lindner et al., 2013) that models the BCL2  
659 signaling pathway before MOMP and is able to calculate the stress dose required for MOMP or if a cell  
660 undergoes MOMP due to a specified stress. DR\_MOMP (Lindner et al., 2013) was translated from its  
661 MATLAB implementation to C++ and R using deSolve (1.28), doParallel (1.0.15) and Rcpp (1.0.5).

662 APOPTO-CELL (Rehm et al., 2006) was executed in MATLAB with the *Statistics and Parallel toolboxes*  
663 (version 2014b, The MathWorks, Inc., Natick, MA, USA). The model requires molar concentrations  
664 [ $\mu\text{M}$ ] of APAF1, PRO-CASPASE 3, PRO-CASPASE 9, SMAC and XIAP as input to predict amount of  
665 cleaved substrate, as a readout for apoptosis susceptibility [%]. Previous research (Hector et al., 2012;  
666 Salvucci et al., 2019a) has shown that APAF1 is not the limiting factor in apoptosome formation in the  
667 CRC settings (Hector et al., 2012; Salvucci et al., 2019a) and was set to 0.123  $\mu\text{M}$ . Molar protein  
668 concentrations for PRO-CASPASE 3, PRO-CASPASE 9, SMAC and XIAP were estimated by aligning signal  
669 intensities [a.U.] to profiles [ $\mu\text{M}$ ] determined in a reference clinically-relevant CRC cohort (Hector et  
670 al., 2012) with an established pipeline (Salvucci et al., 2019a; Salvucci et al., 2017). The pipeline was  
671 built upon the assumptions that 1) measurement ranking is preserved (monotonic relationship  
672 between batch-corrected signaling intensities and molar concentrations); and 2) absolute  
673 concentration profiles in clinically-matched cohorts are comparable. The pipeline implementation  
674 follows directly from the above assumptions. Briefly, for each protein smoothed kernel probability  
675 distribution objects were fitted to 1) the known protein molar concentrations of the reference CRC  
676 cohort (Hector et al., 2012) and 2) batch-corrected multiplexed signal intensities (restricted to high  
677 quality data points where no signal loss across staining rounds had been observed), with the MATLAB  
678 function *fitdist* (as detailed in Salvucci M *et al.* (Salvucci et al., 2017)). The inverse cumulative  
679 distribution transformation of the reference distribution kernel was applied on the batch-corrected  
680 signal intensities to determine the corresponding absolute concentrations (MATLAB function *icdf*).

681 For both models, we performed two sets of simulations: 1) per-core and 2) per-cell. For the per-core  
682 simulations, we aggregated (by median) the batch-corrected protein intensities across all cells for each  
683 core per patient prior to conversion to molar concentrations, resulting in one simulation per-core  
684 and thus 2-3 simulations per patient. For the per-cell simulations, we performed a simulation for each  
685 cell, totaling  $\sim 3.5$  million simulations for 164 patients included in the study.

## 686 **Statistical Analysis**

687 All statistical tests were performed in R (3.6.3) and p values of < 0.05 were considered statistically  
688 significant. All data are presented as mean  $\pm$  SEM. All statistical tests were performed in R. If not  
689 otherwise mentioned, two-tailed t tests were performed for pairwise comparison, while analysis of  
690 variance (ANOVA) with Tukey honest significance post-hoc tests were performed in cases of the  
691 comparison of three or more populations. The quartile coefficients of dispersion (COF) were calculated  
692 using  $(Q_3 - Q_1) / (Q_3 + Q_1)$  with  $Q_n$  be the respective quartiles. Shannon Entropy was calculated either  
693 using  $\log_2$  for binary populations or the natural logarithm, with  $10^{-10}$  added to all values. Moran's I was  
694 calculated using the R package *ape* (5.4-1) without outliers and only on populations > 100 cells.  
695 Distances > 2,000 px were set to 2,000 px. Consensus Clustering was performed using  
696 *ConsensusClusterPlus* (1.48.0) with a seed of 42, 100,000 repetitions, Spearman and Ward's method  
697 as parameters. For the bootstrap analysis, slides were randomly 100,000 times randomly paired using  
698 a seed of 42.

## 699 **Supplemental Information titles and legends**

700 Supplementary Table 1 – Patient information with mean cell fractions and DR\_MOMP and APOPTO-  
701 CELL results for aggregated protein levels for patient-matched cores.

702 Supplementary Table 2 - of transcriptional data derived from flow-sorted immune, epithelial and  
703 fibroblast populations isolated from CRC primary tumor tissue (GSE39396).

704 Supplementary Figure 1 - Plot of patients' consensus cluster score of patient-matched cores after  
705 hierarchical consensus clustering using cancer, immune and stroma cell fractions of each core.  
706 Patients with a low consensus score (0) show high difference in cell fractions between matched cores  
707 while patients with a high consensus score (1) show high similarity in cell fractions between matched  
708 cores.

709 Supplementary Figure 2 – Box plot of transcriptional data derived from flow-sorted immune (n = 6),  
710 epithelial (n = 6) and fibroblast (n = 6) populations isolated from CRC primary tumor tissue (GSE39396  
711 (Calon et al., 2012); Suppl. Table 2; ANOVA and Tukey post-hoc).

712 Supplementary Figure 3 - Box plot of quartile coefficients of dispersion of protein levels of each core  
713 and stratified for cancer (red), immune (blue) and stroma cells (grey).

714 Supplementary Figure 4 - In analog to the correlation plot in Figure 4C-E showing the median  
715 correlation coefficient in all (black), cancer (red), immune (blue) and stroma (gray) cells, but including  
716 the interquartile range.

717 Supplementary Figure 5 - Calculated the Shannon Entropy for the proteins using bins for protein level  
718 with a bin width of z-score = 0.1 SD for each protein respectively and stratified for cancer (red),  
719 immune (blue) and stroma (gray) cells. Proteins were sorted base for (A) DR\_MOMP, (B) APOPTO-CELL  
720 and (C) others.

721 Supplementary Figure 6 - Calculated cores' Moran's I for low/high (I) sensitivity for MOMP for protein  
722 levels stratified for cancer (red), immune (blue) and stroma (gray) cells. Proteins were sorted base for  
723 (A) DR\_MOMP, (B) APOPTO-CELL and (C) others.

## 724 **References**

- 725 Angelo, M., Bendall, S.C., Finck, R., Hale, M.B., Hitzman, C., Borowsky, A.D., Levenson, R.M., Lowe, J.B.,  
726 Liu, S.D., Zhao, S., *et al.* (2014). Multiplexed ion beam imaging of human breast tumors. *Nat Med* *20*,  
727 436-442.
- 728 Badve, S.S., Cho, S., Gökmen-Polar, Y., Sui, Y., Chadwick, C., McDonough, E., Sood, A., Taylor, M.,  
729 Zavodszky, M., Tan, P.H., *et al.* (2021). Multi-protein spatial signatures in ductal carcinoma in situ  
730 (DCIS) of breast. *Br J Cancer*.
- 731 Beare, A., Stockinger, H., Zola, H., and Nicholson, I. (2008). Monoclonal antibodies to human cell  
732 surface antigens. *Curr Protoc Immunol Appendix 4*, 4A.
- 733 Berdasco, M., and Esteller, M. (2010). Aberrant epigenetic landscape in cancer: how cellular identity  
734 goes awry. *Dev Cell* *19*, 698-711.
- 735 Berens, M.E., Sood, A., Barnholtz-Sloan, J.S., Graf, J.F., Cho, S., Kim, S., Kiefer, J., Byron, S.A., Halperin,  
736 R.F., Nasser, S., *et al.* (2019). Multiscale, multimodal analysis of tumor heterogeneity in IDH1 mutant  
737 vs wild-type diffuse gliomas. *PLoS One* *14*, e0219724.
- 738 Calon, A., Espinet, E., Palomo-Ponce, S., Tauriello, D.V., Iglesias, M., Céspedes, M.V., Sevillano, M.,  
739 Nadal, C., Jung, P., Zhang, X.H., *et al.* (2012). Dependency of colorectal cancer on a TGF- $\beta$ -driven  
740 program in stromal cells for metastasis initiation. *Cancer Cell* *22*, 571-584.
- 741 Certo, M., Del Gaizo Moore, V., Nishino, M., Wei, G., Korsmeyer, S., Armstrong, S.A., and Letai, A.  
742 (2006). Mitochondria primed by death signals determine cellular addiction to antiapoptotic BCL-2  
743 family members. *Cancer Cell* *9*, 351-365.
- 744 Decalf, J., Albert, M.L., and Ziai, J. (2019). New tools for pathology: a user's review of a highly  
745 multiplexed method for in situ analysis of protein and RNA expression in tissue. *J Pathol* *247*, 650-661.
- 746 Del Gaizo Moore, V., and Letai, A. (2013). BH3 profiling--measuring integrated function of the  
747 mitochondrial apoptotic pathway to predict cell fate decisions. *Cancer Lett* *332*, 202-205.
- 748 Fichtner, M., Bozkurt, E., Salvucci, M., McCann, C., McAllister, K.A., Halang, L., Düssmann, H., Kinsella,  
749 S., Crawford, N., Sessler, T., *et al.* (2020). Molecular subtype-specific responses of colon cancer cells  
750 to the SMAC mimetic Birinapant. *Cell Death Dis* *11*, 1020.
- 751 Fisher, R., Pusztai, L., and Swanton, C. (2013). Cancer heterogeneity: implications for targeted  
752 therapeutics. *Br J Cancer* *108*, 479-485.
- 753 Flanagan, L., Lindner, A.U., de Chaumont, C., Kehoe, J., Fay, J., Bacon, O., Toomey, S., Huber, H.J.,  
754 Hennessy, B.T., Kay, E.W., *et al.* (2015). BCL2 protein signalling determines acute responses to  
755 neoadjuvant chemoradiotherapy in rectal cancer. *J Mol Med (Berl)* *93*, 315-326.
- 756 Funk, K., Czauderna, C., Klesse, R., Becker, D., Hajduk, J., Oelgeklaus, A., Reichenbach, F., Fimm-Todt,  
757 F., Lauterwasser, J., Galle, P.R., *et al.* (2020). BAX Redistribution Induces Apoptosis Resistance and  
758 Selective Stress Sensitivity in Human HCC. *Cancers (Basel)* *12*.
- 759 Gavathiotis, E., Reyna, D.E., Bellairs, J.A., Leshchiner, E.S., and Walensky, L.D. (2012). Direct and  
760 selective small-molecule activation of proapoptotic BAX. *Nat Chem Biol* *8*, 639-645.

- 761 Gavathiotis, E., Suzuki, M., Davis, M.L., Pitter, K., Bird, G.H., Katz, S.G., Tu, H.C., Kim, H., Cheng, E.H.,  
762 Tjandra, N., *et al.* (2008). BAX activation is initiated at a novel interaction site. *Nature* *455*, 1076-1081.
- 763 Gerdes, M.J., Gökmen-Polar, Y., Sui, Y., Pang, A.S., LaPlante, N., Harris, A.L., Tan, P.H., Ginty, F., and  
764 Badve, S.S. (2018). Single-cell heterogeneity in ductal carcinoma in situ of breast. *Mod Pathol* *31*, 406-  
765 417.
- 766 Gerdes, M.J., Sevinsky, C.J., Sood, A., Adak, S., Bello, M.O., Bordwell, A., Can, A., Corwin, A., Dinn, S.,  
767 Filkins, R.J., *et al.* (2013). Highly multiplexed single-cell analysis of formalin-fixed, paraffin-embedded  
768 cancer tissue. *Proc Natl Acad Sci U S A* *110*, 11982-11987.
- 769 Goltsev, Y., Samusik, N., Kennedy-Darling, J., Bhate, S., Hale, M., Vazquez, G., Black, S., and Nolan, G.P.  
770 (2018). Deep Profiling of Mouse Splenic Architecture with CODEX Multiplexed Imaging. *Cell* *174*, 968-  
771 981.e915.
- 772 Gut, G., Herrmann, M.D., and Pelkmans, L. (2018). Multiplexed protein maps link subcellular  
773 organization to cellular states. *Science* *361*.
- 774 Hanahan, D., and Weinberg, R.A. (2011). Hallmarks of cancer: the next generation. *Cell* *144*, 646-674.
- 775 Hector, S., Rehm, M., Schmid, J., Kehoe, J., McCawley, N., Dicker, P., Murray, F., McNamara, D., Kay,  
776 E.W., Concannon, C.G., *et al.* (2012). Clinical application of a systems model of apoptosis execution for  
777 the prediction of colorectal cancer therapy responses and personalisation of therapy. *Gut* *61*, 725-  
778 733.
- 779 Hori, S., Nomura, T., and Sakaguchi, S. (2003). Control of regulatory T cell development by the  
780 transcription factor Foxp3. *Science* *299*, 1057-1061.
- 781 Huber, H.J., Rehm, M., Plchut, M., Dussmann, H., and Prehn, J.H. (2007). APOPTO-CELL--a simulation  
782 tool and interactive database for analyzing cellular susceptibility to apoptosis. *Bioinformatics* *23*, 648-  
783 650.
- 784 Ichim, G., and Tait, S.W. (2016). A fate worse than death: apoptosis as an oncogenic process. *Nat Rev*  
785 *Cancer* *16*, 539-548.
- 786 Kalkavan, H., and Green, D.R. (2018). MOMP, cell suicide as a BCL-2 family business. *Cell Death Differ*  
787 *25*, 46-55.
- 788 Kalra, J., and Baker, J. (2017). Multiplex Immunohistochemistry for Mapping the Tumor  
789 Microenvironment. *Methods Mol Biol* *1554*, 237-251.
- 790 Kishi, J.Y., Lapan, S.W., Beliveau, B.J., West, E.R., Zhu, A., Sasaki, H.M., Saka, S.K., Wang, Y., Cepko, C.L.,  
791 and Yin, P. (2019). SABER amplifies FISH: enhanced multiplexed imaging of RNA and DNA in cells and  
792 tissues. *Nat Methods* *16*, 533-544.
- 793 Ladoire, S., Arnould, L., Apetoh, L., Coudert, B., Martin, F., Chauffert, B., Fumoleau, P., and Ghiringhelli,  
794 F. (2008). Pathologic complete response to neoadjuvant chemotherapy of breast carcinoma is  
795 associated with the disappearance of tumor-infiltrating foxp3+ regulatory T cells. *Clin Cancer Res* *14*,  
796 2413-2420.
- 797 Leber, B., Lin, J., and Andrews, D.W. (2007). Embedded together: the life and death consequences of  
798 interaction of the Bcl-2 family with membranes. *Apoptosis* *12*, 897-911.

- 799 Lindner, A.U., Concannon, C.G., Boukes, G.J., Cannon, M.D., Llambi, F., Ryan, D., Boland, K., Kehoe, J.,  
800 McNamara, D.A., Murray, F., *et al.* (2013). Systems analysis of BCL2 protein family interactions  
801 establishes a model to predict responses to chemotherapy. *Cancer Res* 73, 519-528.
- 802 Lindner, A.U., Salvucci, M., Morgan, C., Monsefi, N., Resler, A.J., Cremona, M., Curry, S., Toomey, S.,  
803 O'Byrne, R., Bacon, O., *et al.* (2017). BCL-2 system analysis identifies high-risk colorectal cancer  
804 patients. *Gut* 66, 2141-2148.
- 805 Llambi, F., Moldoveanu, T., Tait, S.W., Bouchier-Hayes, L., Temirov, J., McCormick, L.L., Dillon, C.P.,  
806 and Green, D.R. (2011). A unified model of mammalian BCL-2 protein family interactions at the  
807 mitochondria. *Mol Cell* 44, 517-531.
- 808 Lucantoni, F., Lindner, A.U., O'Donovan, N., DÜssmann, H., and Prehn, J.H.M. (2018). Systems modeling  
809 accurately predicts responses to genotoxic agents and their synergism with BCL-2 inhibitors in triple  
810 negative breast cancer cells. *Cell Death Dis* 9, 42.
- 811 Marusyk, A., Almendro, V., and Polyak, K. (2012). Intra-tumour heterogeneity: a looking glass for  
812 cancer? *Nat Rev Cancer* 12, 323-334.
- 813 Matsutani, S., Shibutani, M., Maeda, K., Nagahara, H., Fukuoka, T., Nakao, S., Hirakawa, K., and Ohira,  
814 M. (2018). Significance of tumor-infiltrating lymphocytes before and after neoadjuvant therapy for  
815 rectal cancer. *Cancer Sci* 109, 966-979.
- 816 Mauro, J.A., Butler, S.N., Ramsamooj, M., and Blanck, G. (2015). Copy number loss or silencing of  
817 apoptosis-effector genes in cancer. *Gene* 554, 50-57.
- 818 Moffitt, J.R., and Zhuang, X. (2016). RNA Imaging with Multiplexed Error-Robust Fluorescence In Situ  
819 Hybridization (MERFISH). *Methods Enzymol* 572, 1-49.
- 820 Montero, J., and Letai, A. (2018). Why do BCL-2 inhibitors work and where should we use them in the  
821 clinic? *Cell Death Differ* 25, 56-64.
- 822 Murphy, Á., Weyhenmeyer, B., Schmid, J., Kilbride, S.M., Rehm, M., Huber, H.J., Senft, C.,  
823 Weissenberger, J., Seifert, V., Dunst, M., *et al.* (2013). Activation of executioner caspases is a predictor  
824 of progression-free survival in glioblastoma patients: a systems medicine approach. *Cell Death Dis* 4,  
825 e629.
- 826 Naito, Y., Saito, K., Shiiba, K., Ohuchi, A., Saigenji, K., Nagura, H., and Ohtani, H. (1998). CD8+ T cells  
827 infiltrated within cancer cell nests as a prognostic factor in human colorectal cancer. *Cancer Res* 58,  
828 3491-3494.
- 829 Ni Chonghaile, T., Sarosiek, K.A., Vo, T.T., Ryan, J.A., Tammareddi, A., Moore, V.e.G., Deng, J.,  
830 Anderson, K.C., Richardson, P., Tai, Y.T., *et al.* (2011). Pretreatment mitochondrial priming correlates  
831 with clinical response to cytotoxic chemotherapy. *Science* 334, 1129-1133.
- 832 O'Farrell, A.C., Jarzabek, M.A., Lindner, A.U., Carberry, S., Conroy, E., Miller, I.S., Connor, K., Shiels, L.,  
833 Zanella, E.R., Lucantoni, F., *et al.* (2020). Implementing Systems Modelling and Molecular Imaging to  
834 Predict the Efficacy of BCL-2 Inhibition in Colorectal Cancer Patient-Derived Xenograft Models. *Cancers*  
835 (Basel) 12.
- 836 Passante, E., Würstle, M.L., Hellwig, C.T., Leverkus, M., and Rehm, M. (2013). Systems analysis of  
837 apoptosis protein expression allows the case-specific prediction of cell death responsiveness of  
838 melanoma cells. *Cell Death Differ* 20, 1521-1531.

- 839 Rashid, R., Gaglia, G., Chen, Y.A., Lin, J.R., Du, Z., Maliga, Z., Schapiro, D., Yapp, C., Muhlich, J., Sokolov,  
840 A., *et al.* (2019). Highly multiplexed immunofluorescence images and single-cell data of immune  
841 markers in tonsil and lung cancer. *Sci Data* 6, 323.
- 842 Rehm, M., Huber, H.J., Dussmann, H., and Prehn, J.H. (2006). Systems analysis of effector caspase  
843 activation and its control by X-linked inhibitor of apoptosis protein. *EMBO J* 25, 4338-4349.
- 844 Rehm, M., Huber, H.J., Hellwig, C.T., Anguissola, S., Dussmann, H., and Prehn, J.H. (2009). Dynamics of  
845 outer mitochondrial membrane permeabilization during apoptosis. *Cell Death Differ* 16, 613-623.
- 846 Reichenbach, F., Wiedenmann, C., Schalk, E., Becker, D., Funk, K., Scholz-Kreisel, P., Todt, F.,  
847 Wolleschak, D., Döhner, K., Marquardt, J.U., *et al.* (2017). Mitochondrial BAX Determines the  
848 Predisposition to Apoptosis in Human AML. *Clin Cancer Res* 23, 4805-4816.
- 849 Roberts, A.W., Davids, M.S., Pagel, J.M., Kahl, B.S., Puvvada, S.D., Gerecitano, J.F., Kipps, T.J.,  
850 Anderson, M.A., Brown, J.R., Gressick, L., *et al.* (2016). Targeting BCL2 with Venetoclax in Relapsed  
851 Chronic Lymphocytic Leukemia. *N Engl J Med* 374, 311-322.
- 852 Rohner, L., Reinhart, R., Iype, J., Bachmann, S., Kaufmann, T., and Fux, M. (2020). Impact of BH3-  
853 mimetics on Human and Mouse Blood Leukocytes: A Comparative Study. *Sci Rep* 10, 222.
- 854 Ruvolo, P.P., Deng, X., and May, W.S. (2001). Phosphorylation of Bcl2 and regulation of apoptosis.  
855 *Leukemia* 15, 515-522.
- 856 Saka, S.K., Wang, Y., Kishi, J.Y., Zhu, A., Zeng, Y., Xie, W., Kirli, K., Yapp, C., Cicconet, M., Beliveau, B.J.,  
857 *et al.* (2019). Immuno-SABER enables highly multiplexed and amplified protein imaging in tissues. *Nat*  
858 *Biotechnol* 37, 1080-1090.
- 859 Salvucci, M., Rahman, A., Resler, A.J., Udupi, G.M., McNamara, D.A., Kay, E.W., Laurent-Puig, P.,  
860 Longley, D.B., Johnston, P.G., Lawler, M., *et al.* (2019a). A Machine Learning Platform to Optimize the  
861 Translation of Personalized Network Models to the Clinic. *JCO Clin Cancer Inform* 3, 1-17.
- 862 Salvucci, M., Wurstle, M.L., Morgan, C., Curry, S., Cremona, M., Lindner, A.U., Bacon, O., Resler, A.J.,  
863 Murphy, A.C., O'Byrne, R., *et al.* (2017). A Stepwise Integrated Approach to Personalized Risk  
864 Predictions in Stage III Colorectal Cancer. *Clin Cancer Res* 23, 1200-1212.
- 865 Salvucci, M., Zakaria, Z., Carberry, S., Tivnan, A., Seifert, V., Kögel, D., Murphy, B.M., and Prehn, J.H.M.  
866 (2019b). System-based approaches as prognostic tools for glioblastoma. *BMC Cancer* 19, 1092.
- 867 Schindelin, J., Arganda-Carreras, I., Frise, E., Kaynig, V., Longair, M., Pietzsch, T., Preibisch, S., Rueden,  
868 C., Saalfeld, S., Schmid, B., *et al.* (2012). Fiji: an open-source platform for biological-image analysis. *Nat*  
869 *Methods* 9, 676-682.
- 870 Schmid, J., Dussmann, H., Boukes, G.J., Flanagan, L., Lindner, A.U., O'Connor, C.L., Rehm, M., Prehn,  
871 J.H., and Huber, H.J. (2012). Systems analysis of cancer cell heterogeneity in caspase-dependent  
872 apoptosis subsequent to mitochondrial outer membrane permeabilization. *J Biol Chem* 287, 41546-  
873 41559.
- 874 Sood, A., Miller, A.M., Brogi, E., Sui, Y., Armenia, J., McDonough, E., Santamaria-Pang, A., Carlin, S.,  
875 Stamper, A., Campos, C., *et al.* (2016). Multiplexed immunofluorescence delineates proteomic cancer  
876 cell states associated with metabolism. *JCI Insight* 1.



- 877 Spagnolo, D.M., Al-Kofahi, Y., Zhu, P., Lezon, T.R., Gough, A., Stern, A.M., Lee, A.V., Ginty, F., Sarachan,  
878 B., Taylor, D.L., *et al.* (2017). Platform for Quantitative Evaluation of Spatial Intratumoral  
879 Heterogeneity in Multiplexed Fluorescence Images. *Cancer Res* 77, e71-e74.
- 880 Spencer, S.L., Gaudet, S., Albeck, J.G., Burke, J.M., and Sorger, P.K. (2009). Non-genetic origins of cell-  
881 to-cell variability in TRAIL-induced apoptosis. *Nature* 459, 428-432.
- 882 Tan, W.C.C., Nerurkar, S.N., Cai, H.Y., Ng, H.H.M., Wu, D., Wee, Y.T.F., Lim, J.C.T., Yeong, J., and Lim,  
883 T.K.H. (2020). Overview of multiplex immunohistochemistry/immunofluorescence techniques in the  
884 era of cancer immunotherapy. *Cancer Commun (Lond)* 40, 135-153.
- 885 Thienpont, B., Steinbacher, J., Zhao, H., D'Anna, F., Kuchnio, A., Ploumakis, A., Ghesquière, B., Van  
886 Dyck, L., Boeckx, B., Schoonjans, L., *et al.* (2016). Tumour hypoxia causes DNA hypermethylation by  
887 reducing TET activity. *Nature* 537, 63-68.
- 888 Walensky, L.D., and Gavathiotis, E. (2011). BAX unleashed: the biochemical transformation of an  
889 inactive cytosolic monomer into a toxic mitochondrial pore. *Trends Biochem Sci* 36, 642-652.
- 890 Yan, Y., Leontovich, A.A., Gerdes, M.J., Desai, K., Dong, J., Sood, A., Santamaria-Pang, A., Mansfield,  
891 A.S., Chadwick, C., Zhang, R., *et al.* (2019). Understanding heterogeneous tumor microenvironment in  
892 metastatic melanoma. *PLoS One* 14, e0216485.
- 893



# Figure 1

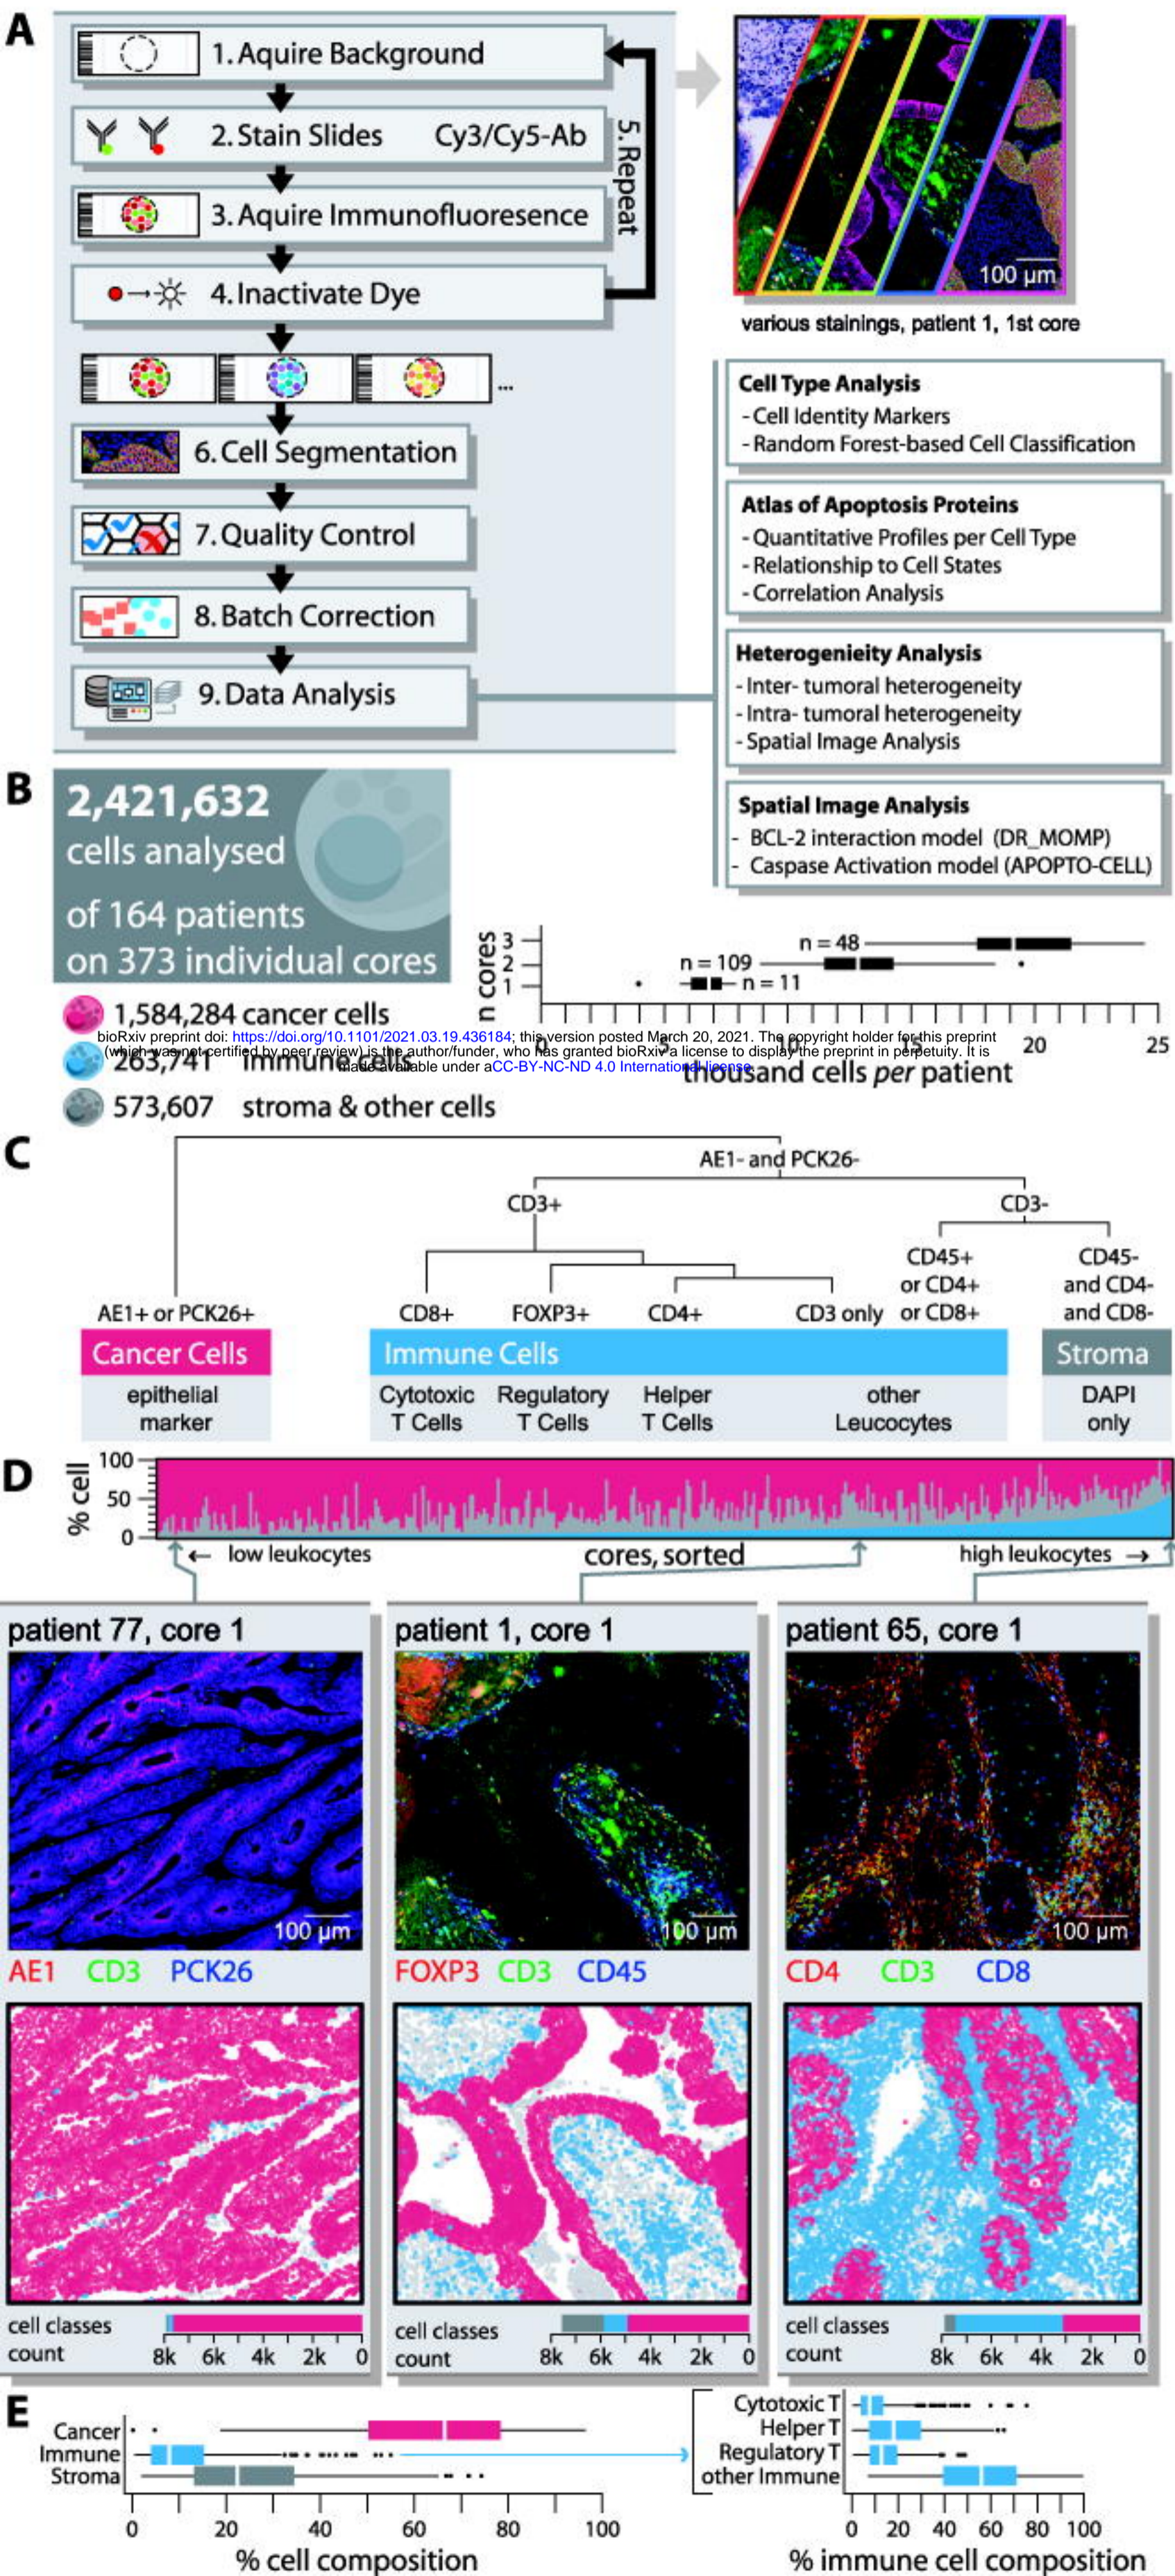



# Figure 2

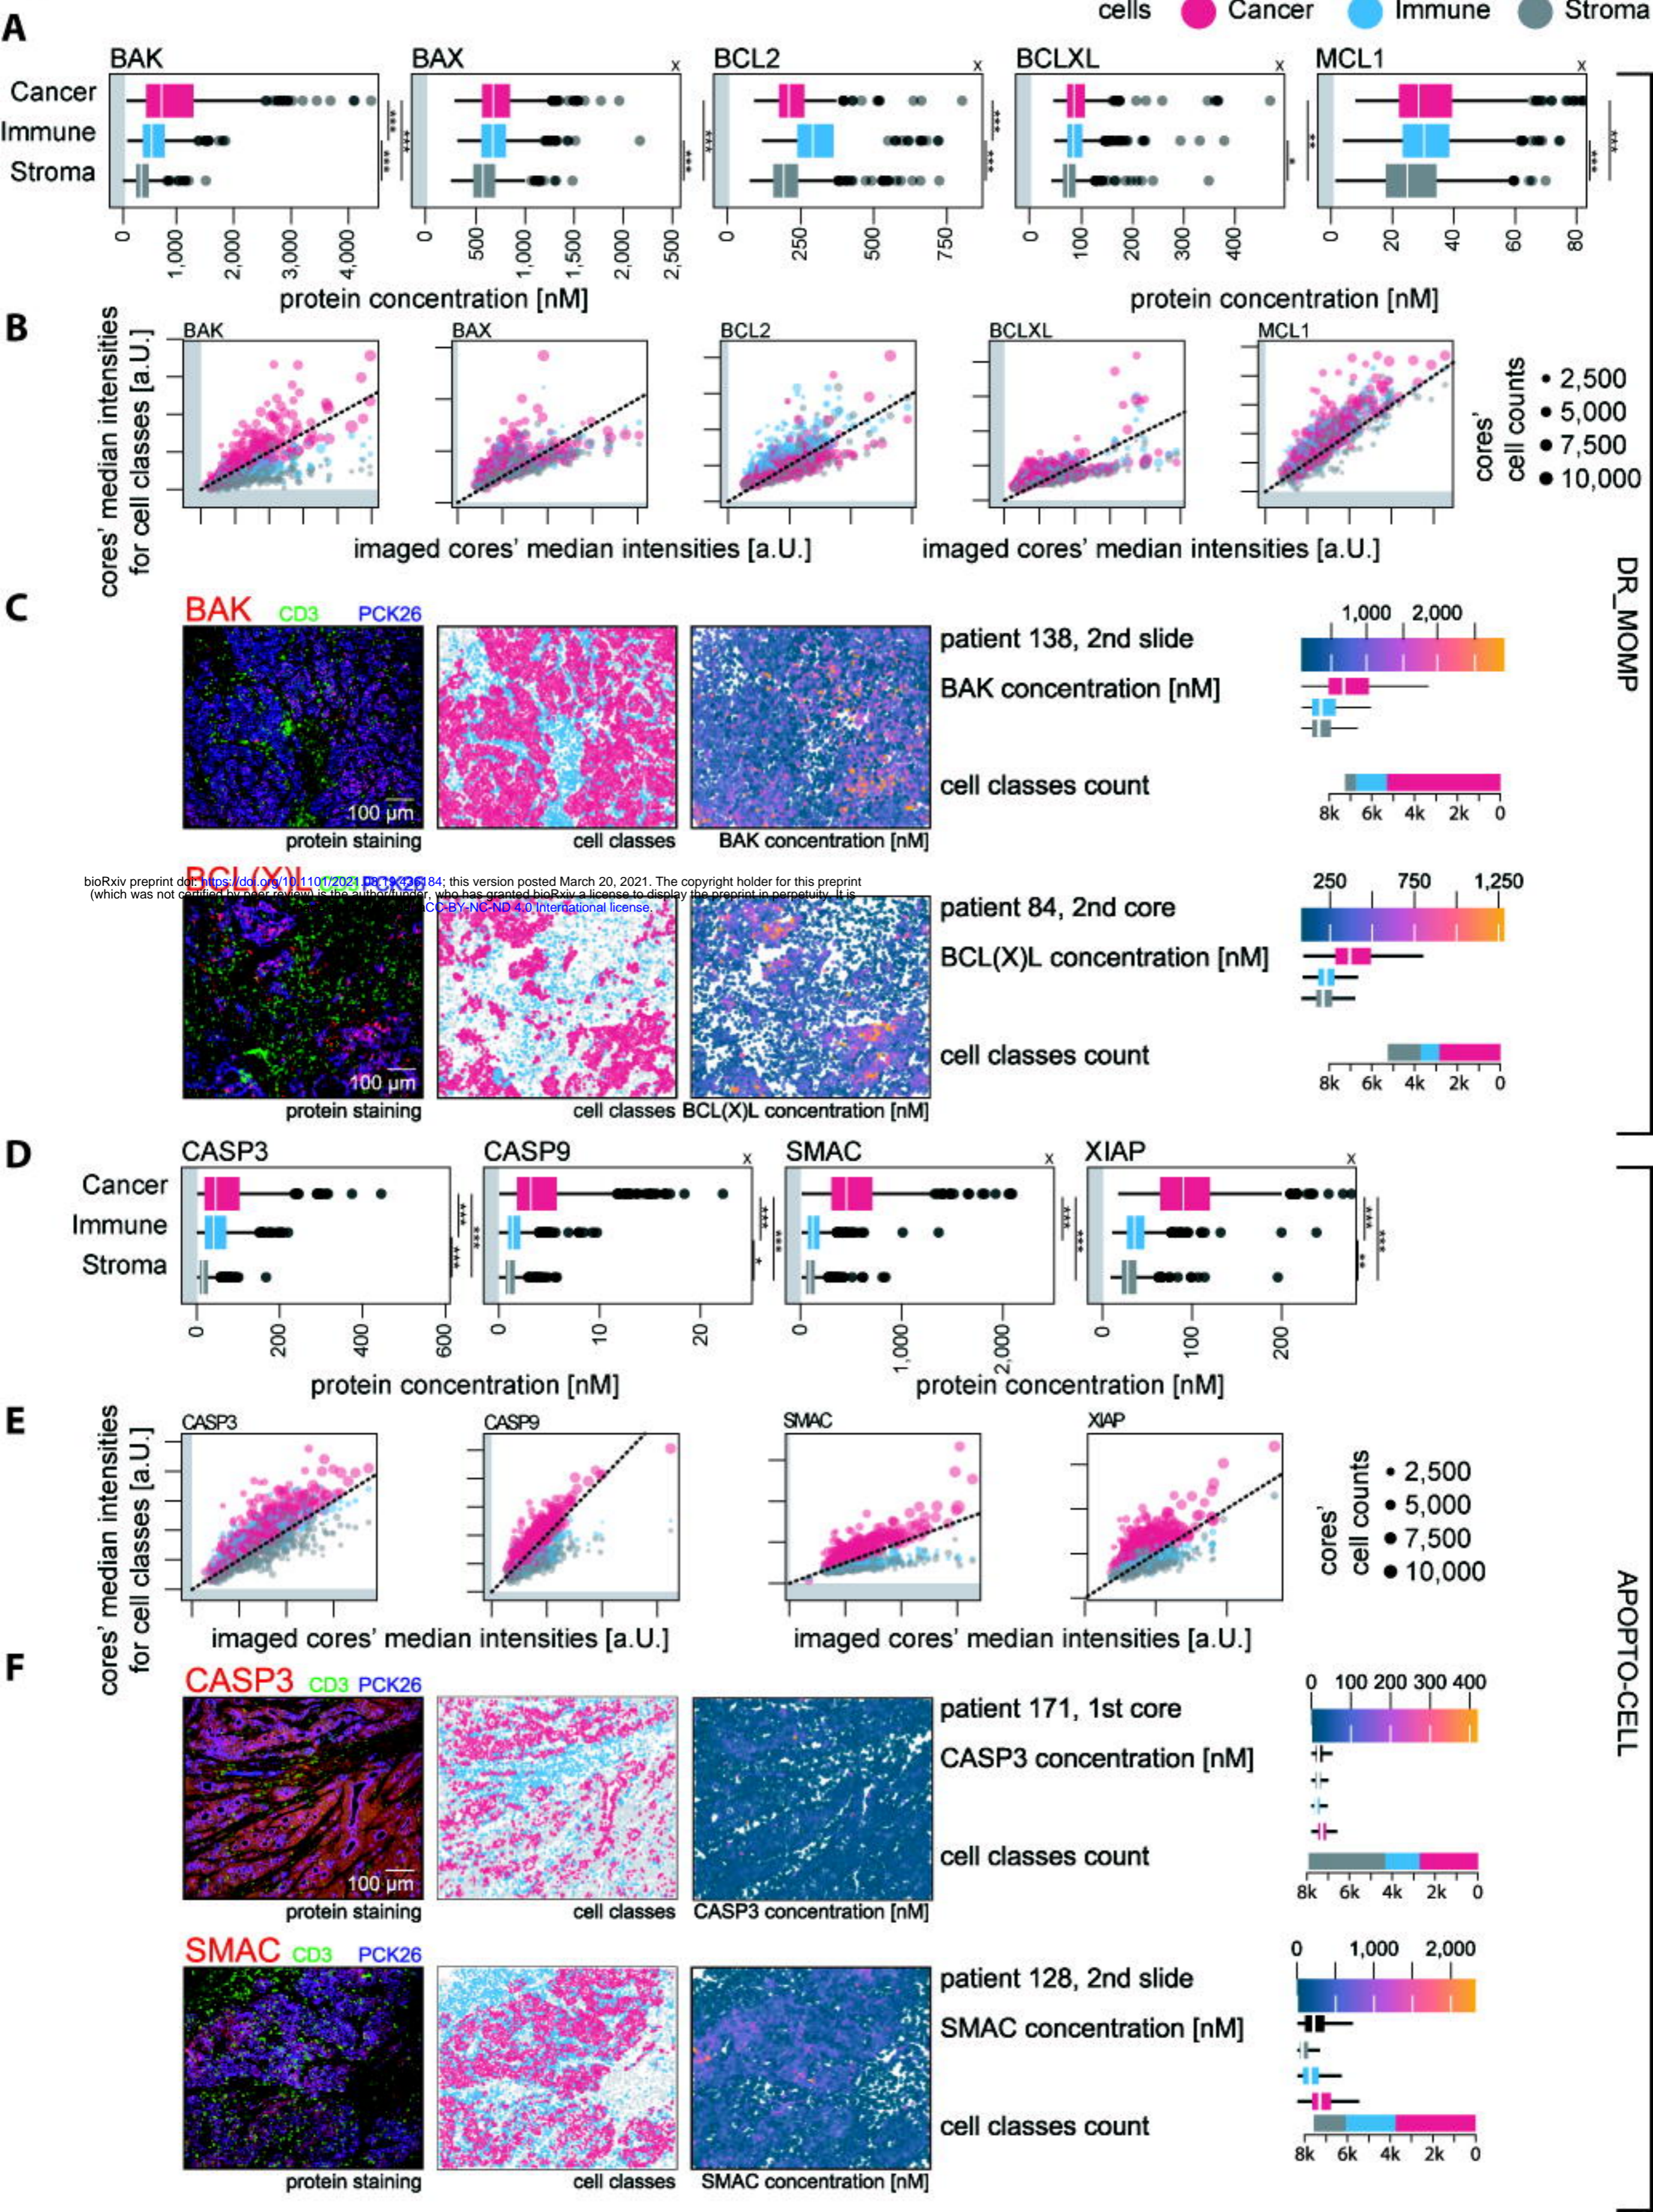



### Figure 3

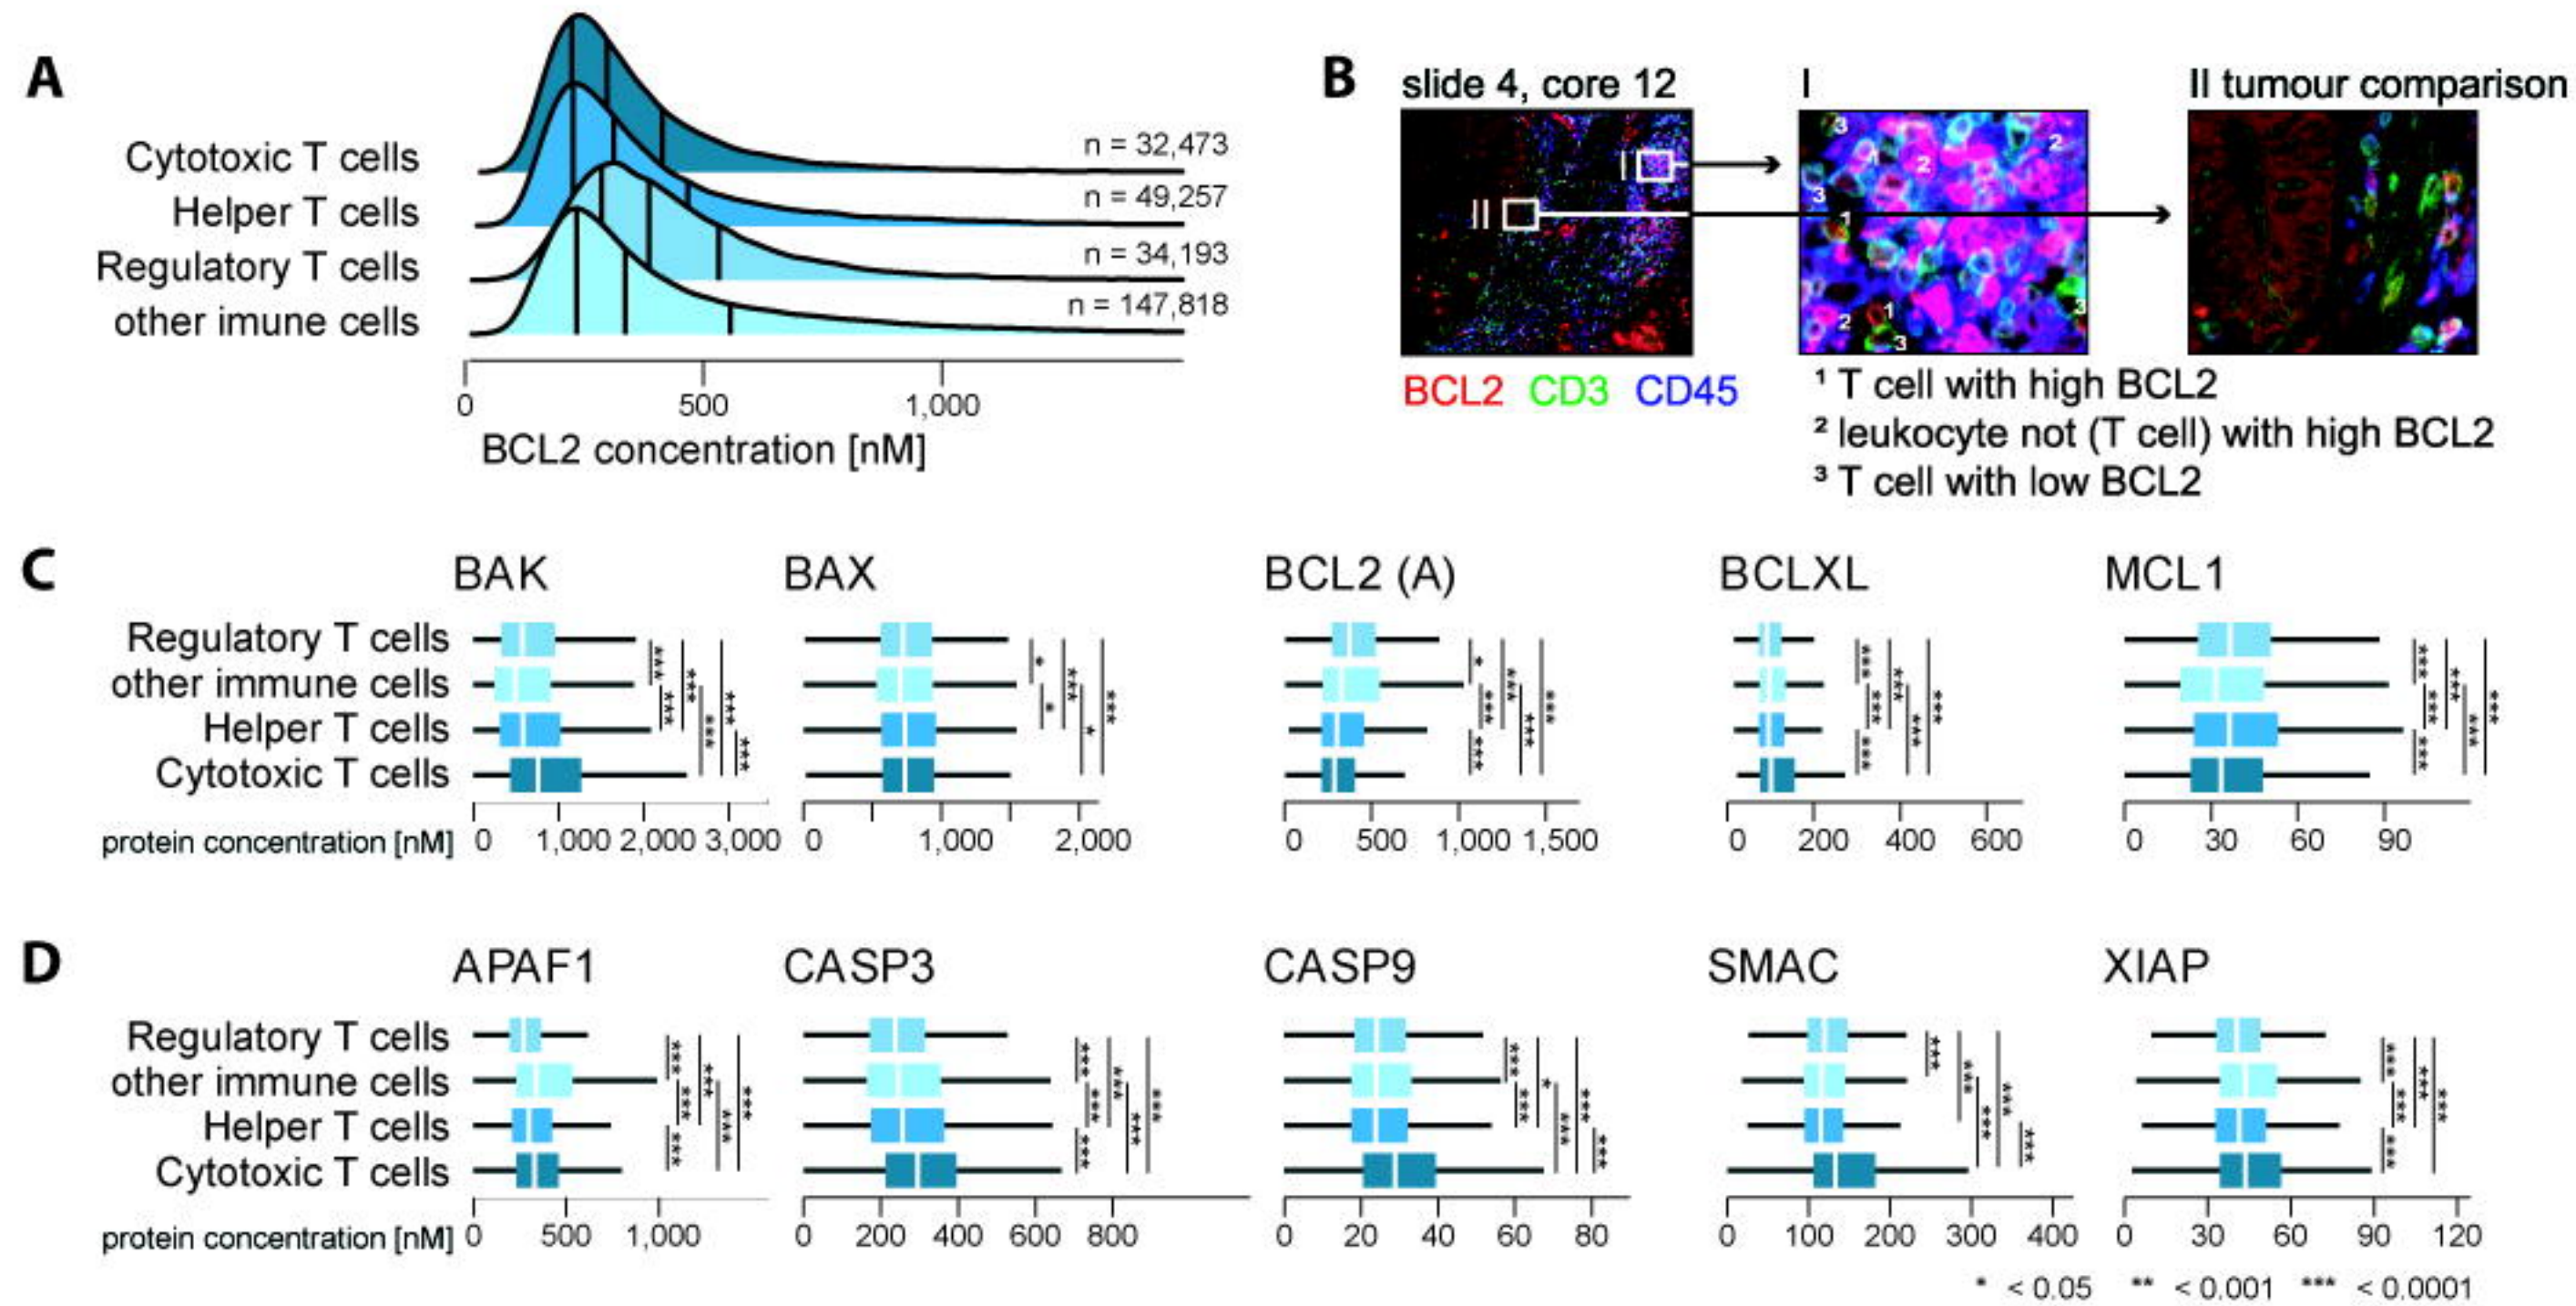

**Figure 4**

● Cancer ● Immune ● Stroma Cells

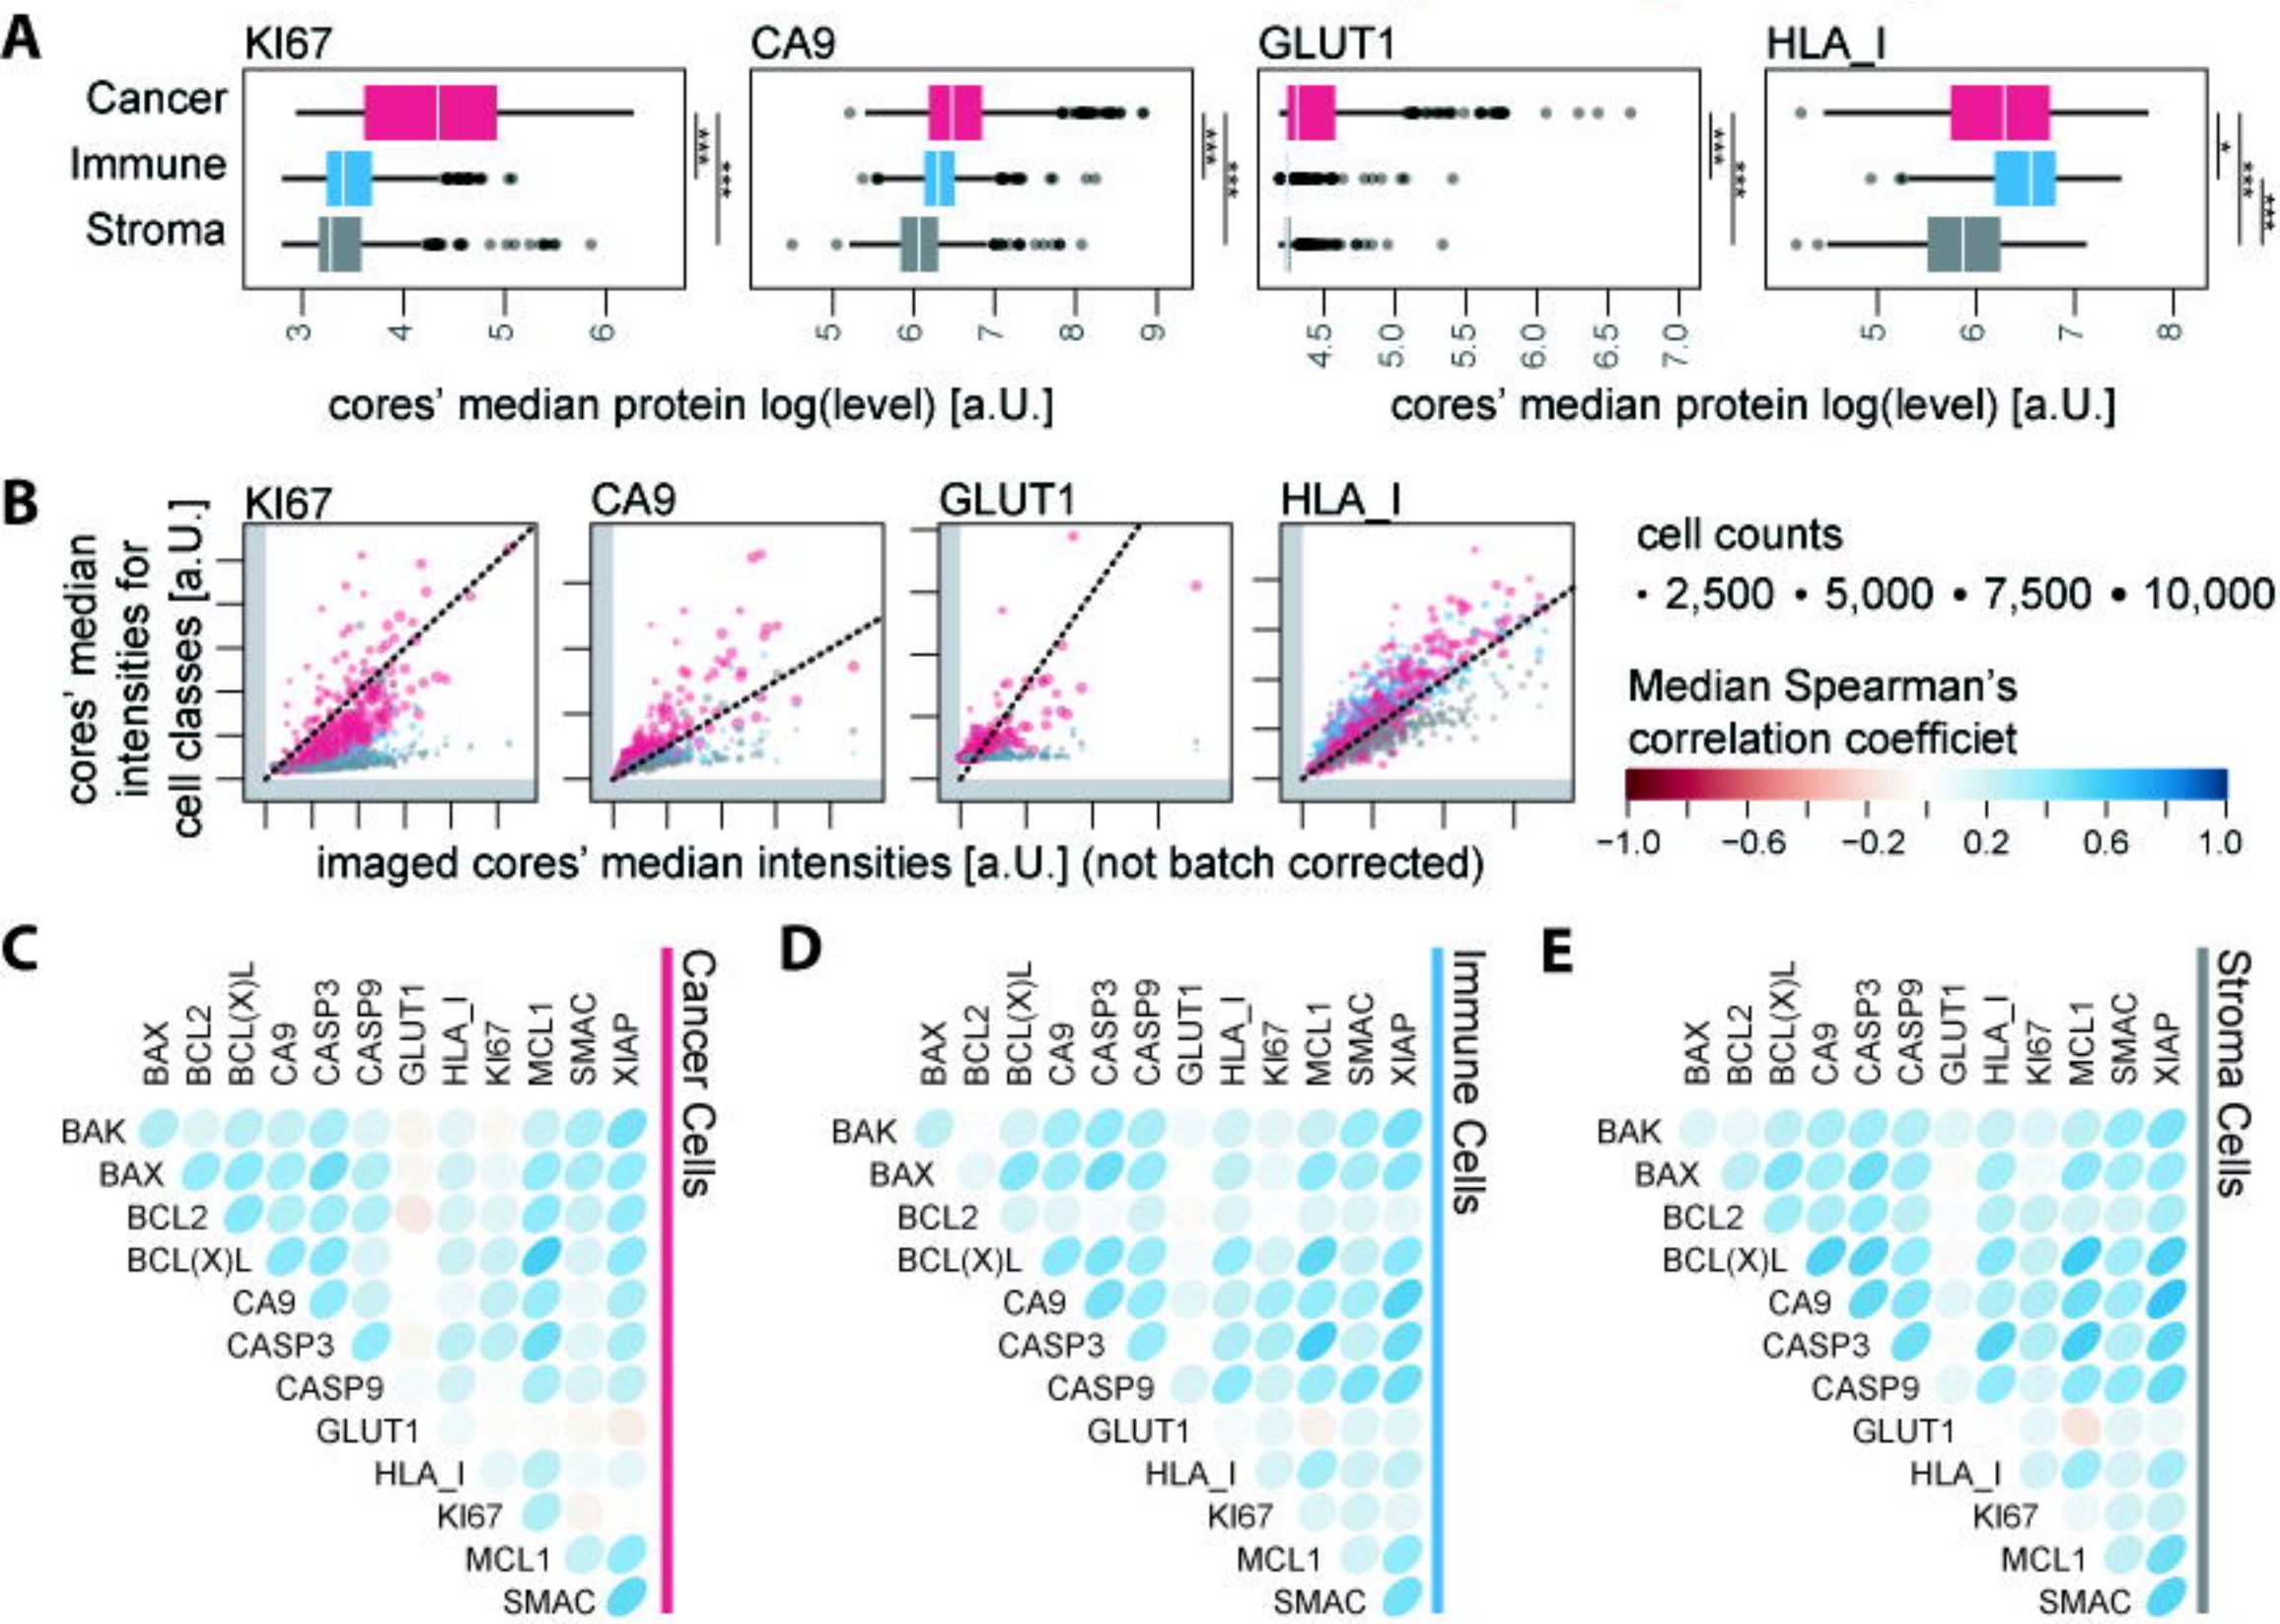



**Figure 5**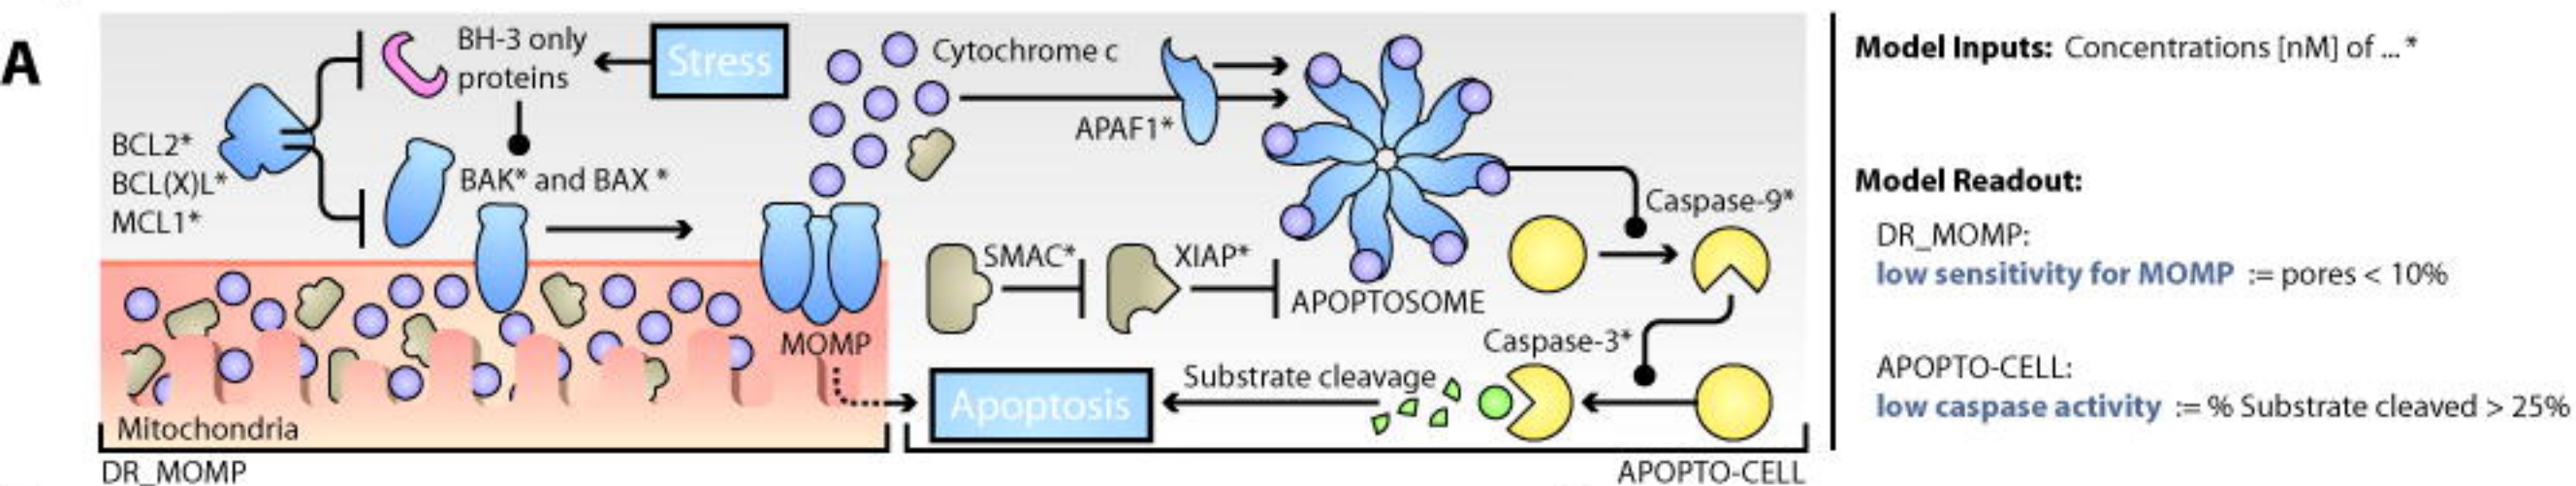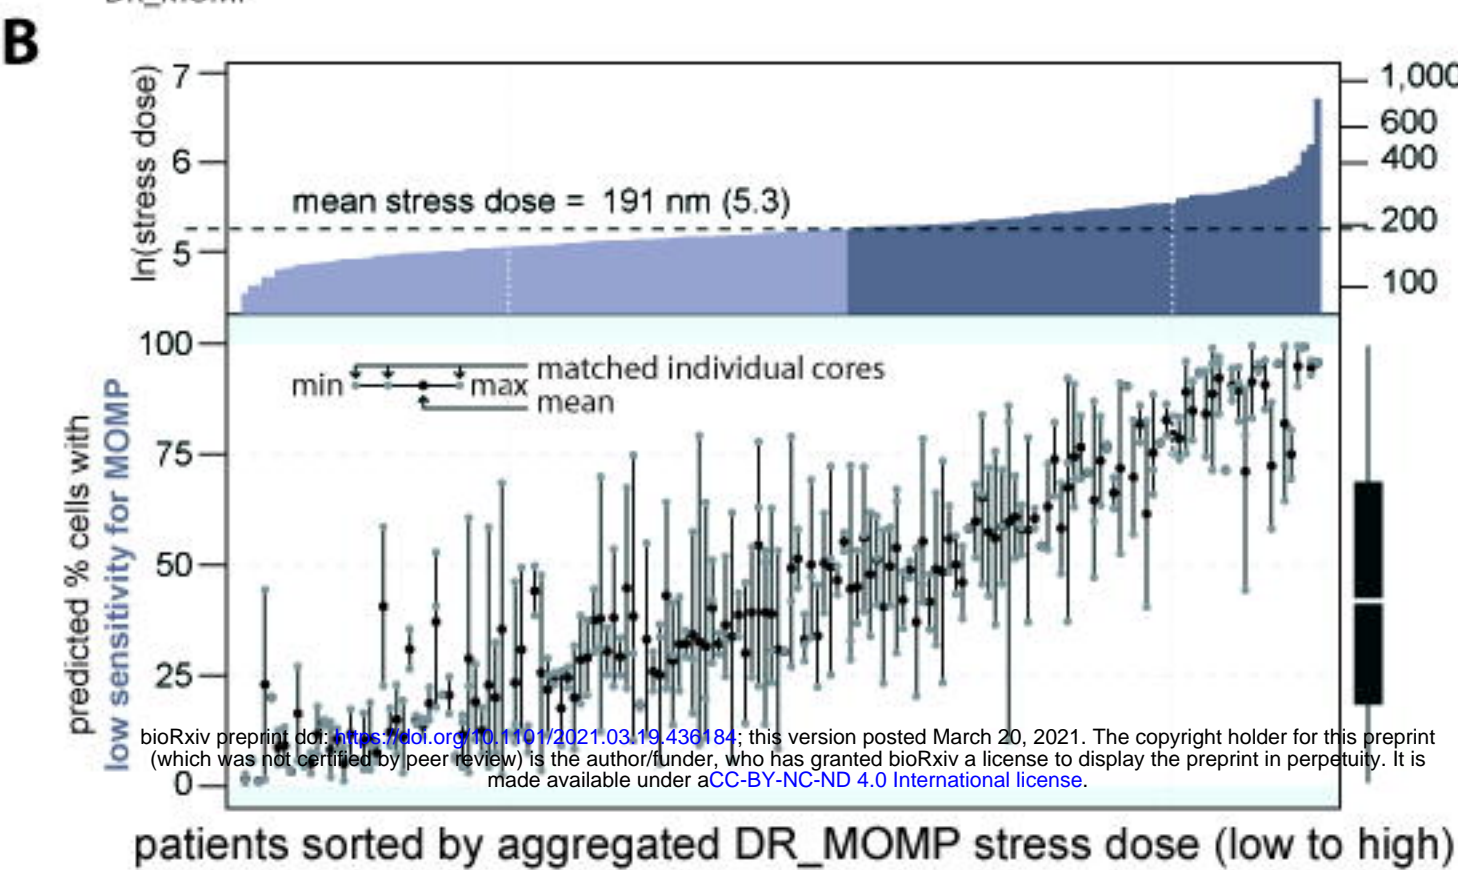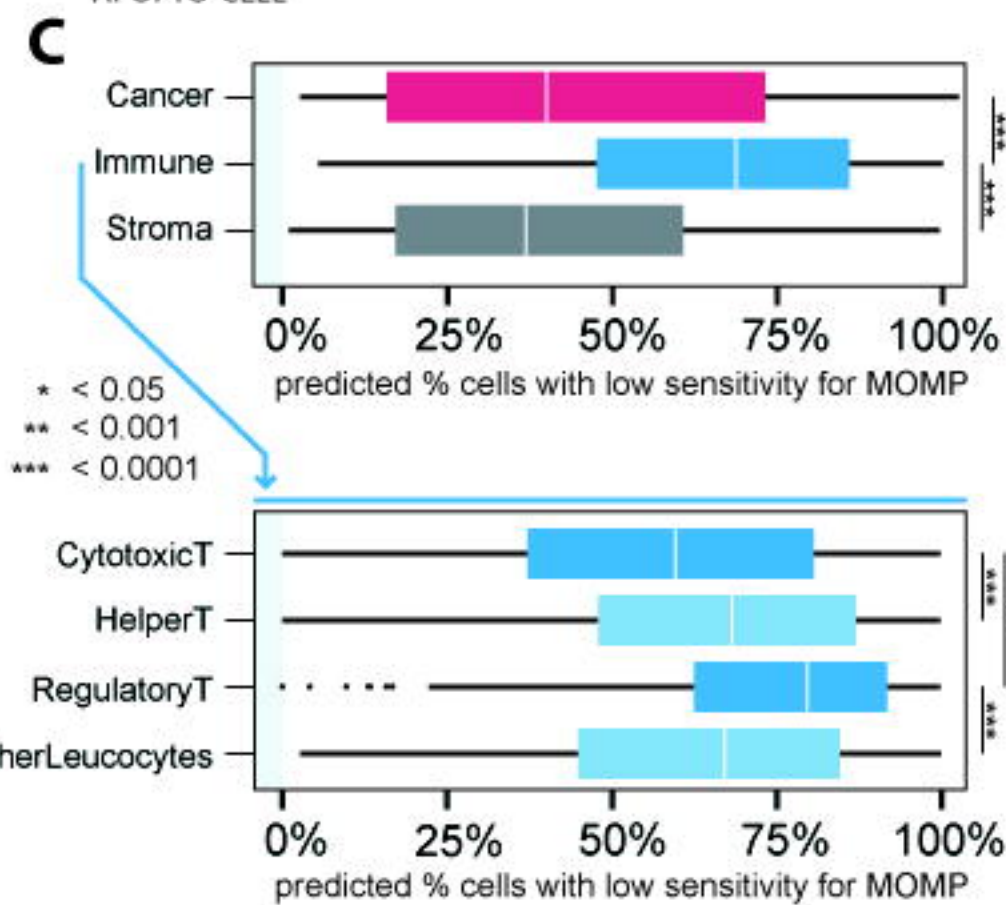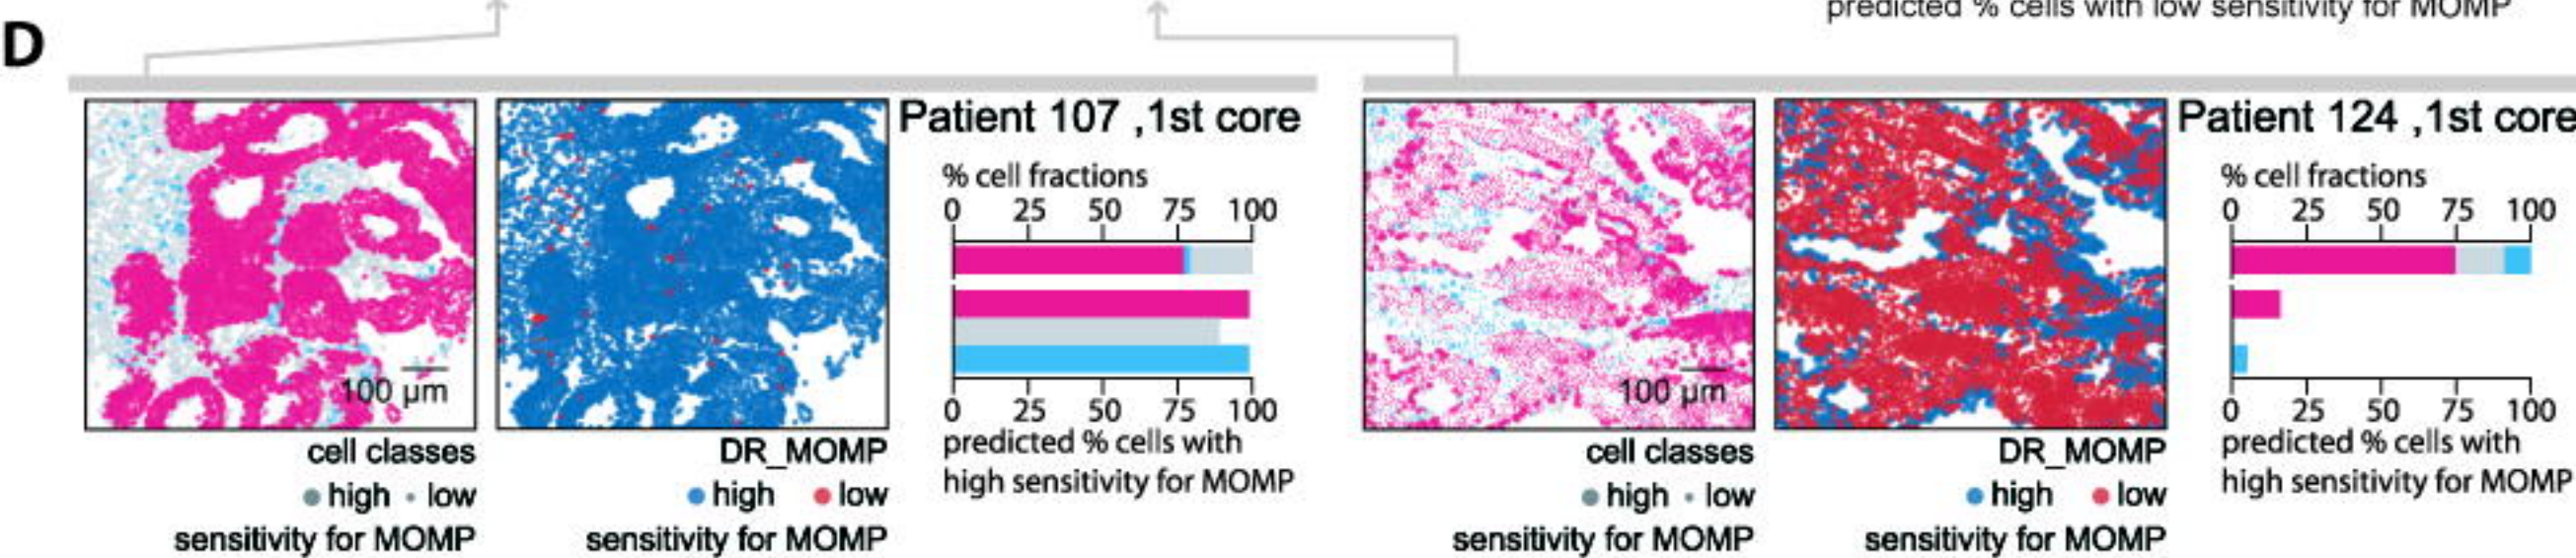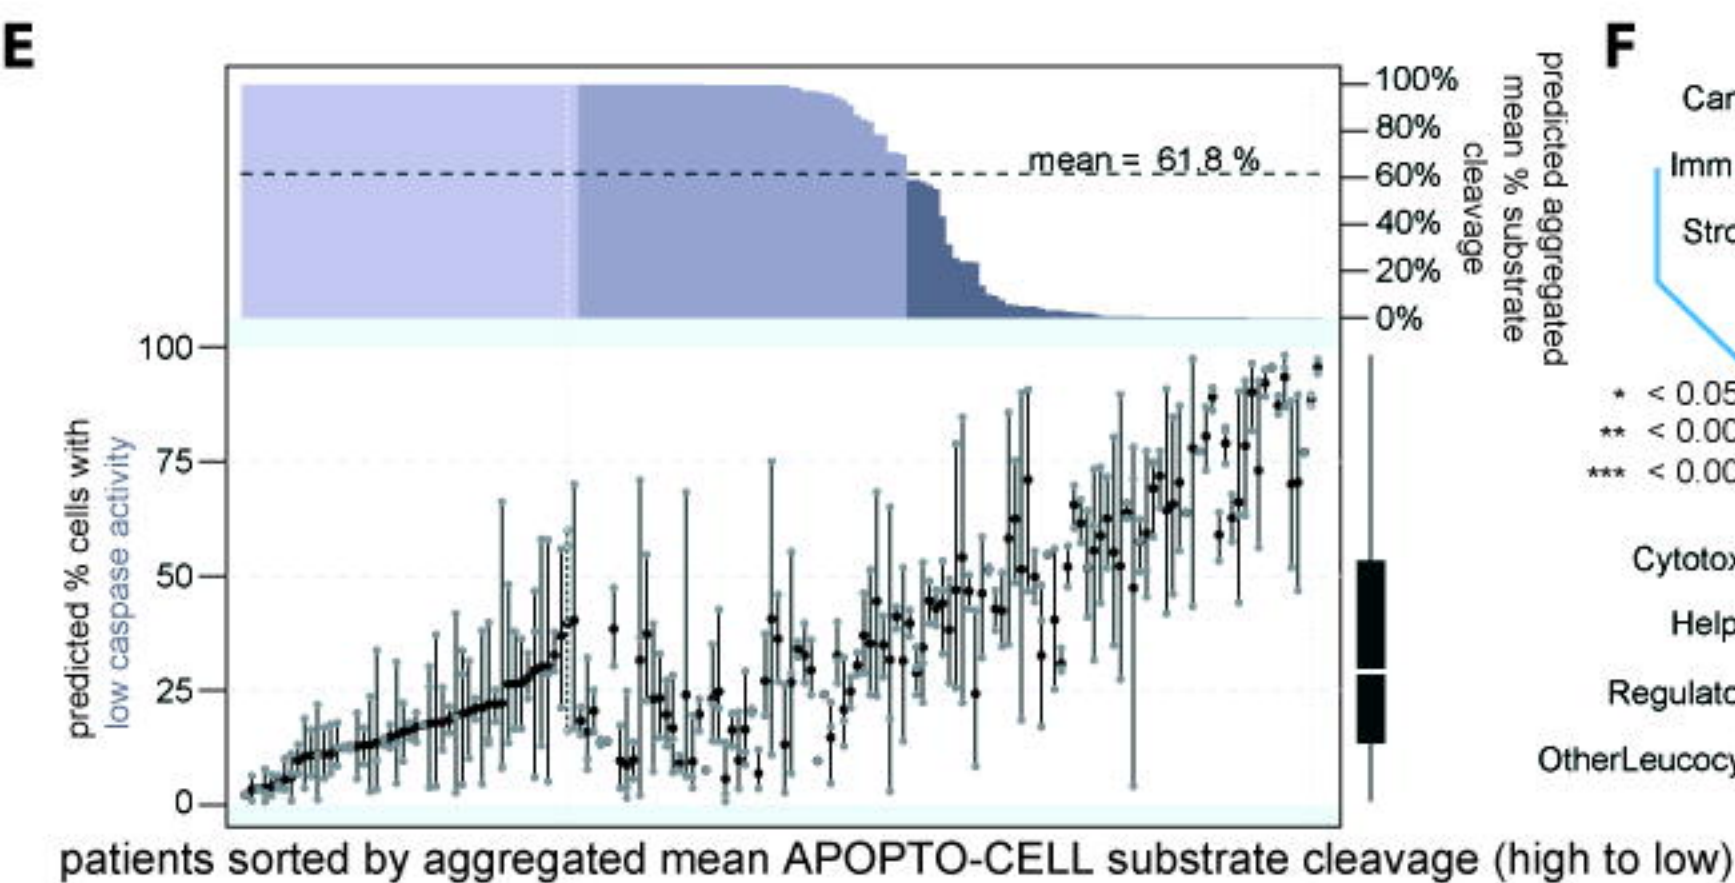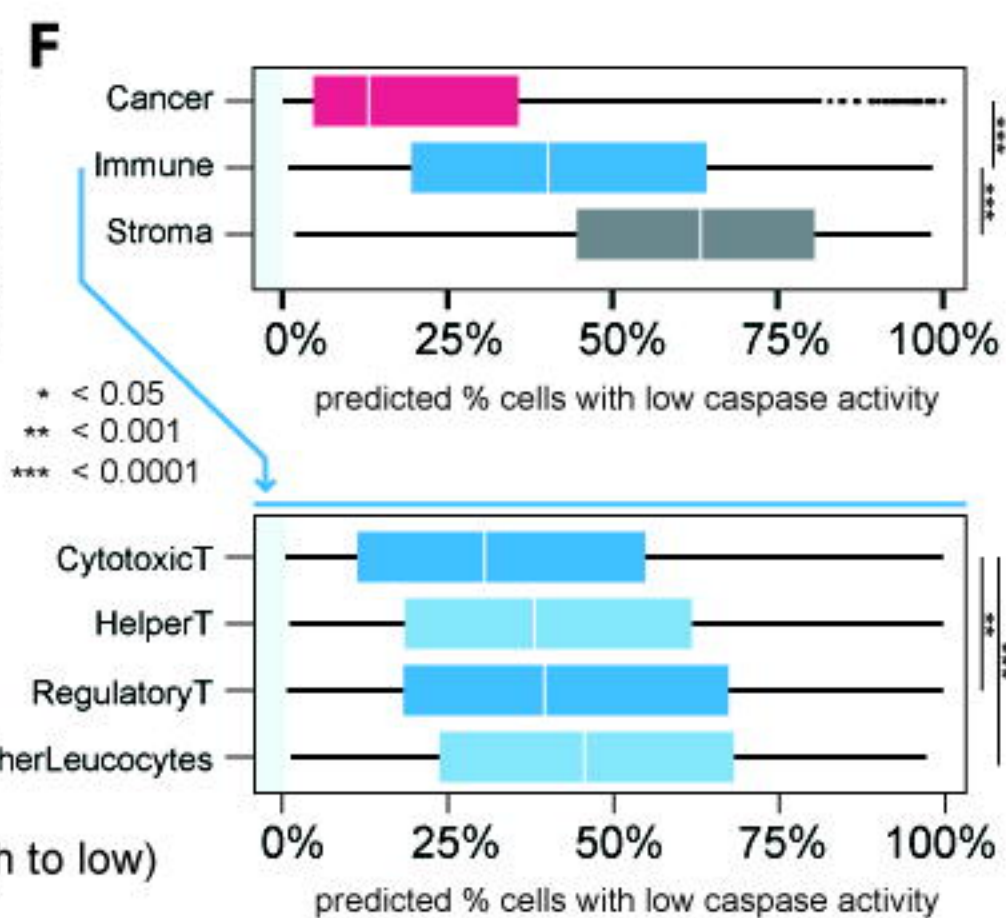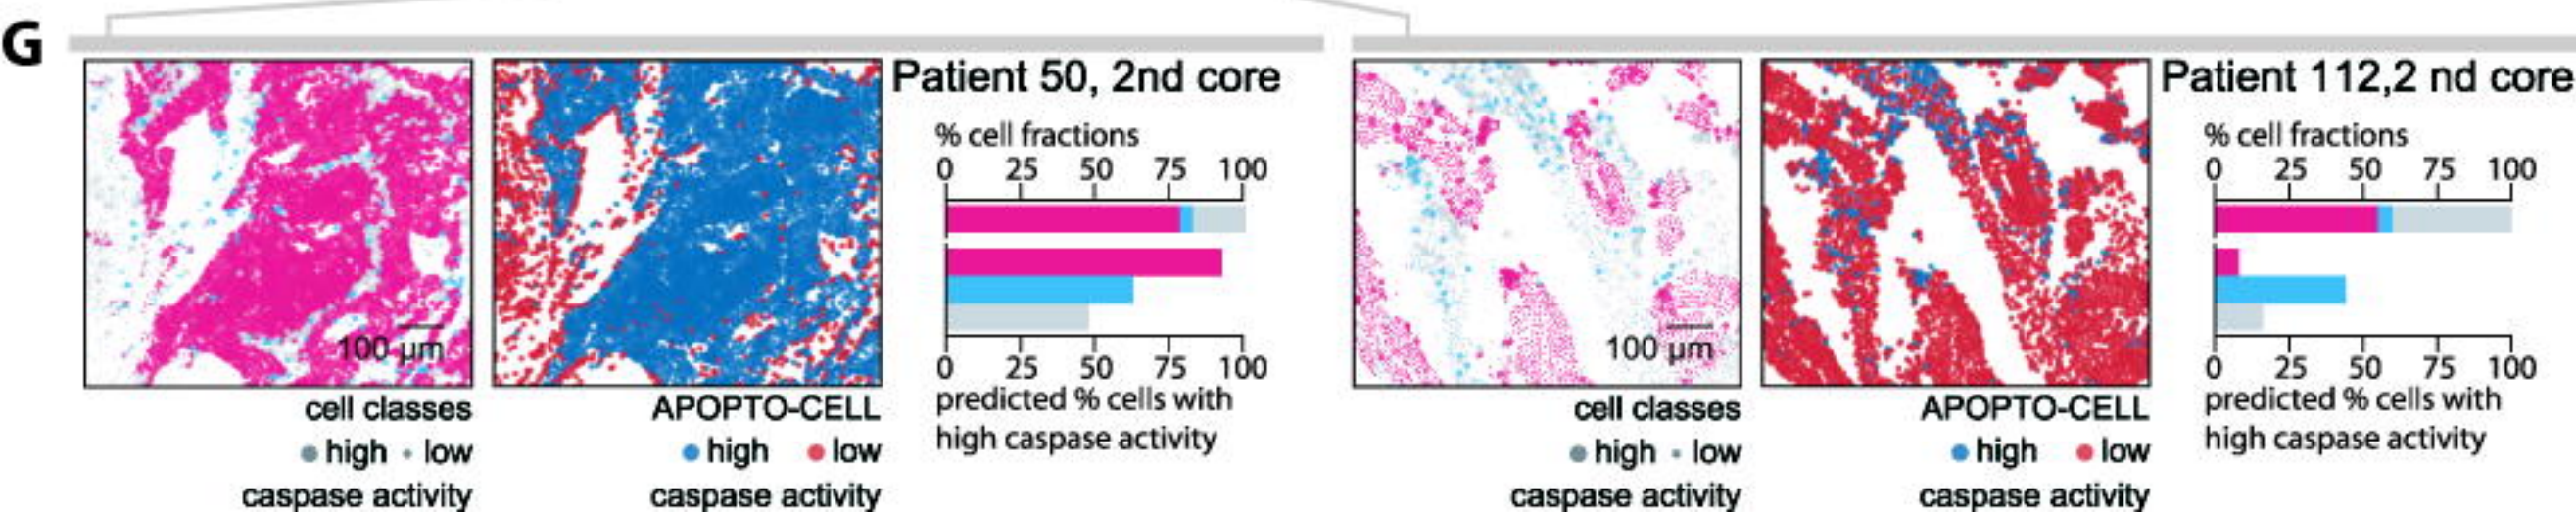

DR\_MOMP

APOPTO-CELL



**Figure 6****A**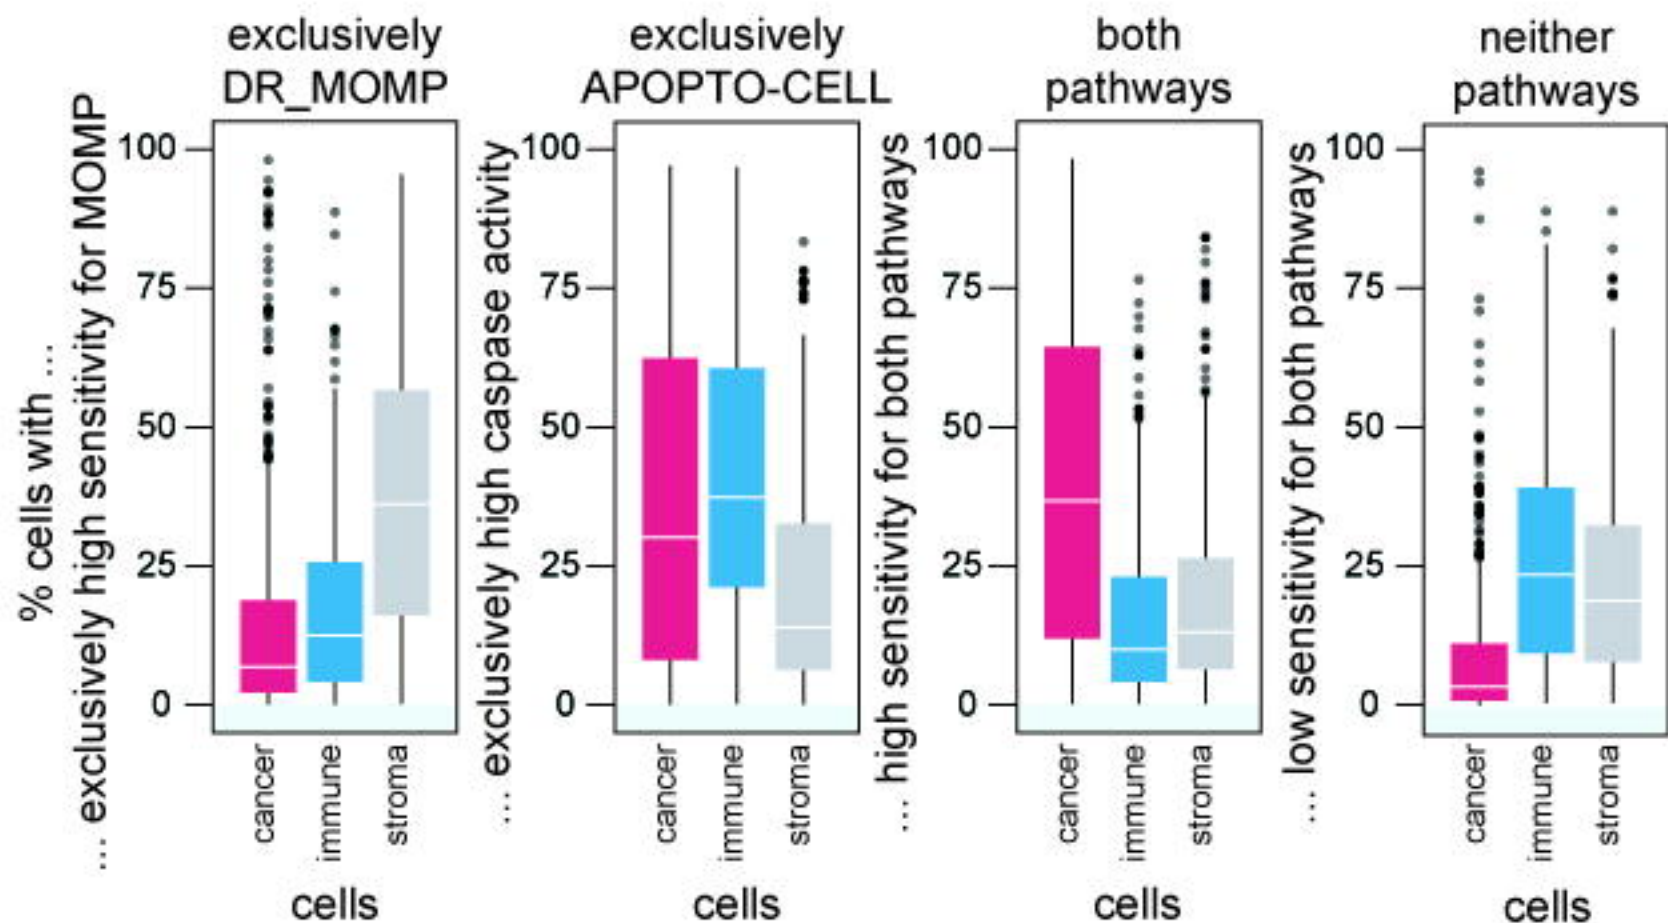**B**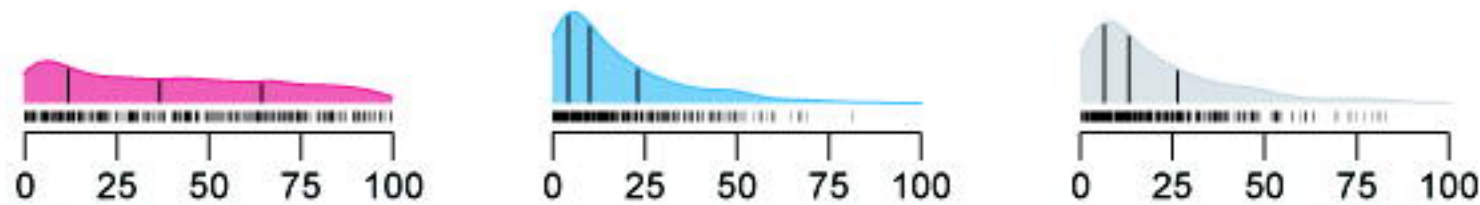**C**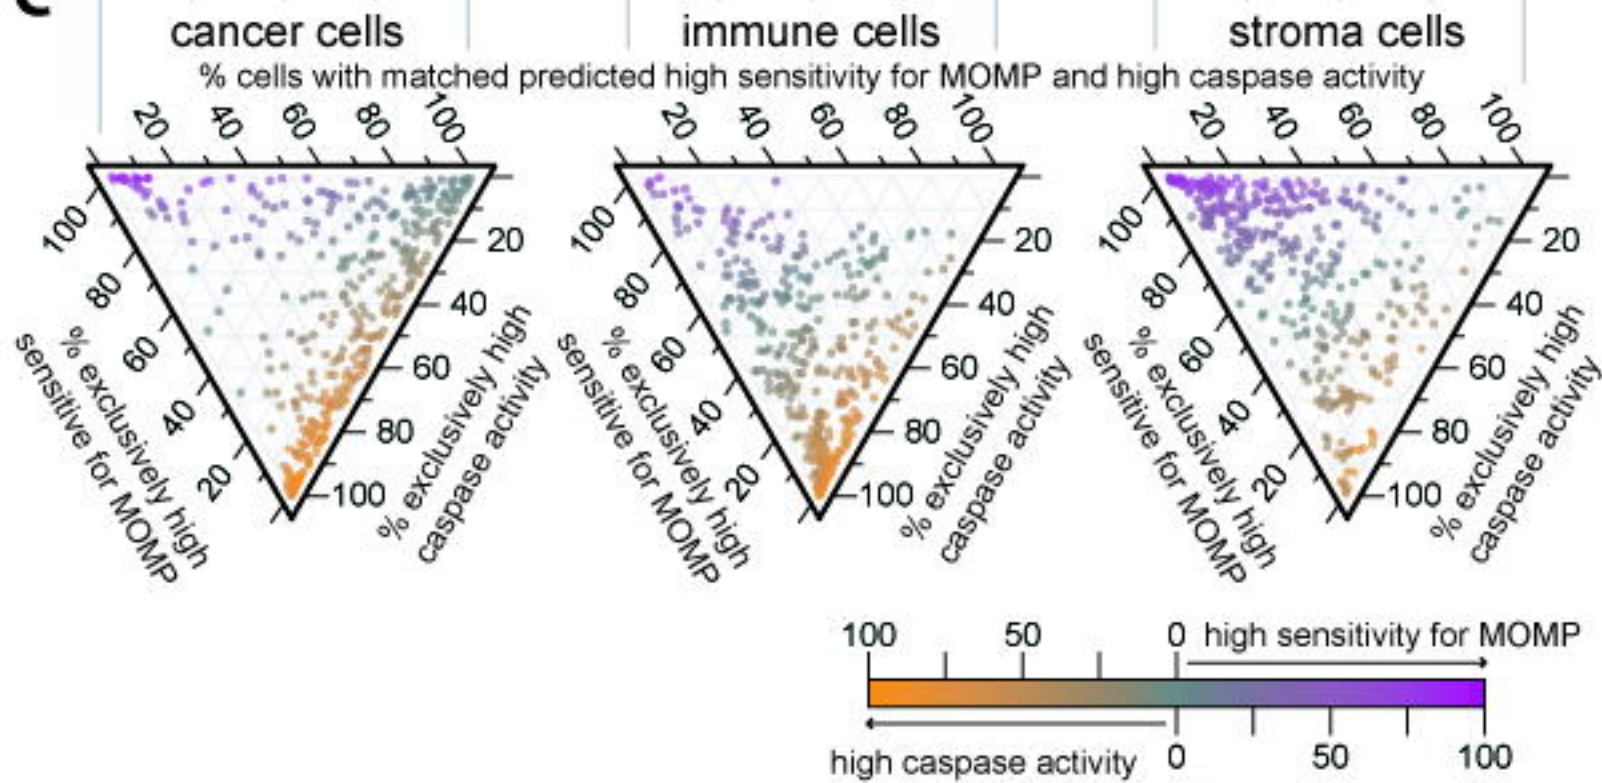



**Figure 7**

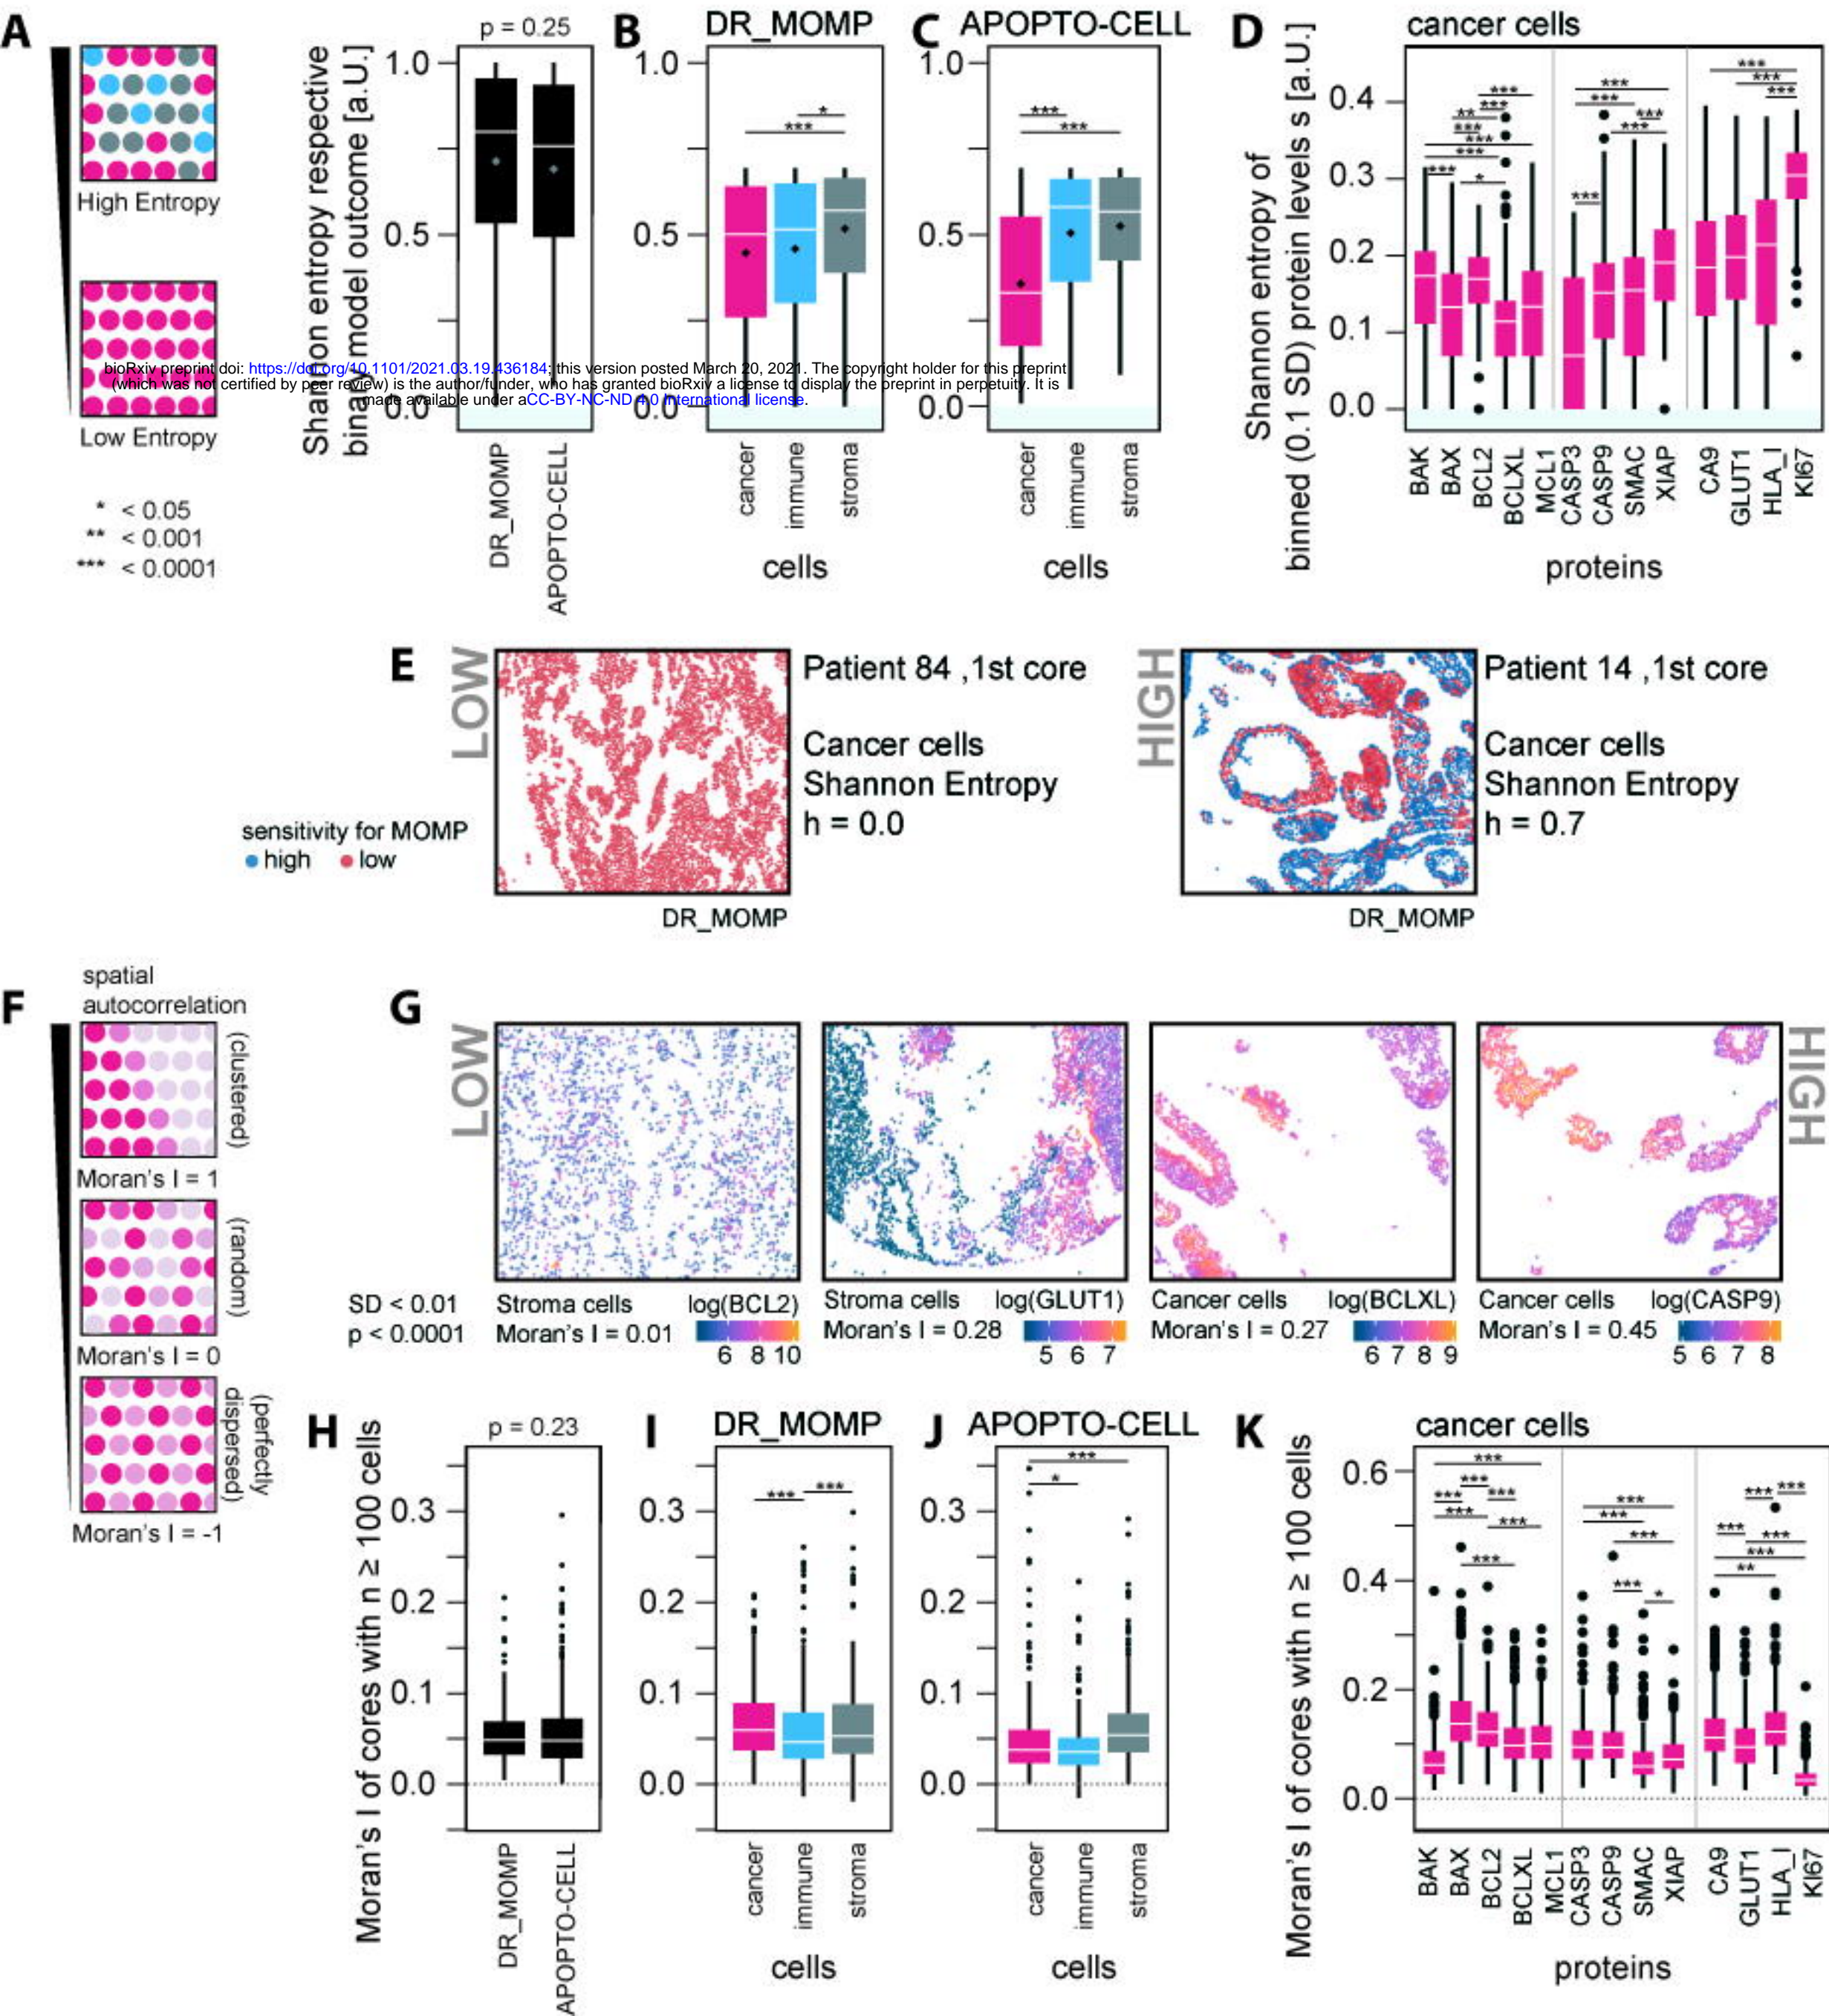

Source: http://biorxiv.org/content/10.1101/2021.03.19.436184v1.full.pdf
